# Supplementary material for: Observed changes in stratospheric circulation: Decreasing lifetime of N 2 O, 2005–2021
Source: Copernicus journal article supplement (doi:10.5194/acp-2022-650), 2022-09-27
Supplement: Supplementary file 1 [file acp-2022-650-supplement.pdf]

*Supplement of*

**Observed changes in stratospheric circulation: Decreasing lifetime of N<sub>2</sub>O, 2005-2021**

Michael J. Prather<sup>1</sup>, Lucien Froidevaux<sup>2</sup>, Nathaniel J. Livesey<sup>2</sup>

<sup>1</sup>Earth System Science Department, University of California Irvine; Irvine, CA 92697-3100, USA

<sup>2</sup>Jet Propulsion Laboratory, California Institute of Technology; Pasadena, CA 91011, USA

Correspondence to: Michael Prather ([mprather@uci.edu](mailto:mprather@uci.edu))

This Supplement contains data tables of the time series plotted in the paper. It also includes the time series and figures for the N<sub>2</sub>O stratospheric abundances (f-N<sub>2</sub>O) in northern and southern mid-latitudes that were discussed but not plotted or shown

**Table S1.**

| year    | loss (TgN/y)  | burden (TgN)  | lifetime (y)  | prod NO (TgN/y) |
|---------|---------------|---------------|---------------|-----------------|
|         | <b>fig 1A</b> | <b>fig 1B</b> | <b>fig 1C</b> | <b>fig 1D</b>   |
| 2005.08 | 12.92         | 1523.0        | 117.90        | 0.7538          |
| 2005.17 | 12.99         | 1523.3        | 117.20        | 0.7570          |
| 2005.25 | 13.02         | 1523.5        | 117.00        | 0.7578          |
| 2005.33 | 13.00         | 1523.9        | 117.30        | 0.7563          |
| 2005.42 | 12.98         | 1524.2        | 117.40        | 0.7551          |
| 2005.50 | 13.04         | 1524.5        | 116.90        | 0.7586          |
| 2005.58 | 13.20         | 1524.8        | 115.50        | 0.7670          |
| 2005.67 | 13.33         | 1525.2        | 114.40        | 0.7734          |
| 2005.75 | 13.35         | 1525.5        | 114.30        | 0.7746          |
| 2005.83 | 13.29         | 1525.9        | 114.80        | 0.7720          |
| 2005.92 | 13.17         | 1526.3        | 115.90        | 0.7670          |
| 2006.00 | 13.04         | 1526.7        | 117.10        | 0.7616          |
| 2006.08 | 12.91         | 1527.1        | 118.30        | 0.7555          |
| 2006.17 | 12.76         | 1527.5        | 119.70        | 0.7484          |
| 2006.25 | 12.65         | 1527.9        | 120.80        | 0.7430          |
| 2006.33 | 12.58         | 1528.2        | 121.50        | 0.7392          |
| 2006.42 | 12.54         | 1528.5        | 121.90        | 0.7375          |
| 2006.50 | 12.47         | 1528.8        | 122.60        | 0.7330          |
| 2006.58 | 12.34         | 1529.1        | 123.90        | 0.7261          |
| 2006.67 | 12.25         | 1529.3        | 124.80        | 0.7216          |
| 2006.75 | 12.27         | 1529.5        | 124.60        | 0.7225          |
| 2006.83 | 12.36         | 1529.7        | 123.70        | 0.7269          |
| 2006.92 | 12.50         | 1529.9        | 122.40        | 0.7330          |
| 2007.00 | 12.62         | 1530.2        | 121.20        | 0.7385          |
| 2007.08 | 12.75         | 1530.4        | 120.00        | 0.7441          |
| 2007.17 | 12.88         | 1530.6        | 118.80        | 0.7505          |
| 2007.25 | 12.97         | 1530.9        | 118.00        | 0.7552          |
| 2007.33 | 13.03         | 1531.2        | 117.50        | 0.7588          |
| 2007.42 | 13.05         | 1531.5        | 117.30        | 0.7603          |
| 2007.50 | 13.09         | 1531.8        | 117.00        | 0.7625          |
| 2007.58 | 13.16         | 1532.2        | 116.40        | 0.7669          |
| 2007.67 | 13.28         | 1532.6        | 115.40        | 0.7736          |
| 2007.75 | 13.36         | 1533.0        | 114.80        | 0.7781          |
| 2007.83 | 13.35         | 1533.5        | 114.90        | 0.7779          |
| 2007.92 | 13.27         | 1534.0        | 115.60        | 0.7743          |
| 2008.00 | 13.17         | 1534.5        | 116.50        | 0.7703          |
| 2008.08 | 13.06         | 1534.9        | 117.60        | 0.7652          |
| 2008.17 | 12.93         | 1535.4        | 118.80        | 0.7587          |
| 2008.25 | 12.83         | 1535.8        | 119.70        | 0.7537          |
| 2008.33 | 12.79         | 1536.2        | 120.20        | 0.7516          |
| 2008.42 | 12.79         | 1536.5        | 120.10        | 0.7518          |
| 2008.50 | 12.79         | 1536.9        | 120.10        | 0.7517          |
| 2008.58 | 12.75         | 1537.2        | 120.60        | 0.7490          |
| 2008.67 | 12.68         | 1537.6        | 121.30        | 0.7443          |
| 2008.75 | 12.58         | 1537.9        | 122.20        | 0.7390          |
| 2008.83 | 12.56         | 1538.2        | 122.50        | 0.7376          |
| 2008.92 | 12.62         | 1538.5        | 121.90        | 0.7400          |
| 2009.00 | 12.71         | 1538.6        | 121.10        | 0.7437          |
| 2009.08 | 12.80         | 1538.9        | 120.20        | 0.7476          |
| 2009.17 | 12.88         | 1539.1        | 119.50        | 0.7509          |
| 2009.25 | 12.93         | 1539.4        | 119.00        | 0.7532          |

|         |       |        |        |        |
|---------|-------|--------|--------|--------|
| 2009.33 | 12.94 | 1539.8 | 119.00 | 0.7532 |
| 2009.42 | 12.96 | 1540.1 | 118.80 | 0.7538 |
| 2009.50 | 13.06 | 1540.4 | 118.00 | 0.7584 |
| 2009.58 | 13.17 | 1540.7 | 117.00 | 0.7642 |
| 2009.67 | 13.25 | 1541.0 | 116.30 | 0.7684 |
| 2009.75 | 13.30 | 1541.2 | 115.90 | 0.7707 |
| 2009.83 | 13.31 | 1541.6 | 115.80 | 0.7715 |
| 2009.92 | 13.31 | 1542.0 | 115.90 | 0.7713 |
| 2010.00 | 13.29 | 1542.4 | 116.10 | 0.7707 |
| 2010.08 | 13.29 | 1542.8 | 116.10 | 0.7718 |
| 2010.17 | 13.36 | 1543.2 | 115.50 | 0.7763 |
| 2010.25 | 13.40 | 1543.6 | 115.20 | 0.7798 |
| 2010.33 | 13.41 | 1544.0 | 115.10 | 0.7816 |
| 2010.42 | 13.37 | 1544.4 | 115.60 | 0.7806 |
| 2010.50 | 13.28 | 1544.8 | 116.30 | 0.7776 |
| 2010.58 | 13.26 | 1545.3 | 116.50 | 0.7780 |
| 2010.67 | 13.31 | 1545.8 | 116.10 | 0.7817 |
| 2010.75 | 13.43 | 1546.2 | 115.20 | 0.7887 |
| 2010.83 | 13.53 | 1546.7 | 114.40 | 0.7932 |
| 2010.92 | 13.62 | 1547.1 | 113.60 | 0.7971 |
| 2011.00 | 13.67 | 1547.6 | 113.20 | 0.7989 |
| 2011.08 | 13.67 | 1548.0 | 113.20 | 0.7981 |
| 2011.17 | 13.62 | 1548.4 | 113.70 | 0.7943 |
| 2011.25 | 13.57 | 1548.8 | 114.10 | 0.7911 |
| 2011.33 | 13.55 | 1549.1 | 114.30 | 0.7890 |
| 2011.42 | 13.58 | 1549.4 | 114.10 | 0.7896 |
| 2011.50 | 13.60 | 1549.8 | 114.00 | 0.7892 |
| 2011.58 | 13.57 | 1550.2 | 114.20 | 0.7867 |
| 2011.67 | 13.47 | 1550.5 | 115.10 | 0.7800 |
| 2011.75 | 13.32 | 1550.9 | 116.40 | 0.7720 |
| 2011.83 | 13.21 | 1551.2 | 117.40 | 0.7669 |
| 2011.92 | 13.09 | 1551.5 | 118.50 | 0.7615 |
| 2012.00 | 13.01 | 1551.8 | 119.30 | 0.7578 |
| 2012.08 | 12.97 | 1552.1 | 119.70 | 0.7562 |
| 2012.17 | 12.97 | 1552.5 | 119.70 | 0.7569 |
| 2012.25 | 12.98 | 1552.9 | 119.60 | 0.7577 |
| 2012.33 | 12.98 | 1553.2 | 119.60 | 0.7578 |
| 2012.42 | 12.92 | 1553.5 | 120.20 | 0.7551 |
| 2012.50 | 12.81 | 1553.8 | 121.30 | 0.7502 |
| 2012.58 | 12.74 | 1554.1 | 122.00 | 0.7476 |
| 2012.67 | 12.74 | 1554.3 | 122.00 | 0.7483 |
| 2012.75 | 12.76 | 1554.6 | 121.90 | 0.7493 |
| 2012.83 | 12.75 | 1554.9 | 122.00 | 0.7492 |
| 2012.92 | 12.71 | 1555.3 | 122.30 | 0.7482 |
| 2013.00 | 12.66 | 1555.7 | 122.90 | 0.7466 |
| 2013.08 | 12.61 | 1556.1 | 123.40 | 0.7450 |
| 2013.17 | 12.58 | 1556.5 | 123.70 | 0.7440 |
| 2013.25 | 12.61 | 1556.9 | 123.40 | 0.7462 |
| 2013.33 | 12.69 | 1557.2 | 122.70 | 0.7509 |
| 2013.42 | 12.79 | 1557.6 | 121.80 | 0.7559 |
| 2013.50 | 12.85 | 1558.0 | 121.20 | 0.7590 |
| 2013.58 | 12.80 | 1558.4 | 121.70 | 0.7561 |
| 2013.67 | 12.74 | 1558.9 | 122.40 | 0.7529 |
| 2013.75 | 12.73 | 1559.3 | 122.40 | 0.7532 |

|         |       |        |        |        |
|---------|-------|--------|--------|--------|
| 2013.83 | 12.81 | 1559.7 | 121.80 | 0.7570 |
| 2013.92 | 12.93 | 1560.1 | 120.60 | 0.7625 |
| 2014.00 | 13.06 | 1560.5 | 119.50 | 0.7677 |
| 2014.08 | 13.17 | 1560.9 | 118.60 | 0.7720 |
| 2014.17 | 13.24 | 1561.4 | 117.90 | 0.7752 |
| 2014.25 | 13.26 | 1561.9 | 117.80 | 0.7755 |
| 2014.33 | 13.25 | 1562.4 | 117.90 | 0.7745 |
| 2014.42 | 13.26 | 1562.9 | 117.90 | 0.7745 |
| 2014.50 | 13.35 | 1563.5 | 117.10 | 0.7791 |
| 2014.58 | 13.50 | 1564.1 | 115.90 | 0.7864 |
| 2014.67 | 13.59 | 1564.6 | 115.10 | 0.7909 |
| 2014.75 | 13.58 | 1565.1 | 115.20 | 0.7900 |
| 2014.83 | 13.51 | 1565.6 | 115.90 | 0.7863 |
| 2014.92 | 13.43 | 1566.0 | 116.60 | 0.7822 |
| 2015.00 | 13.37 | 1566.5 | 117.10 | 0.7797 |
| 2015.08 | 13.35 | 1566.9 | 117.40 | 0.7785 |
| 2015.17 | 13.31 | 1567.2 | 117.80 | 0.7760 |
| 2015.25 | 13.26 | 1567.6 | 118.20 | 0.7737 |
| 2015.33 | 13.21 | 1567.9 | 118.70 | 0.7712 |
| 2015.42 | 13.14 | 1568.3 | 119.40 | 0.7680 |
| 2015.50 | 13.04 | 1568.7 | 120.30 | 0.7622 |
| 2015.58 | 12.91 | 1569.0 | 121.50 | 0.7553 |
| 2015.67 | 12.86 | 1569.3 | 122.00 | 0.7523 |
| 2015.75 | 12.92 | 1569.7 | 121.50 | 0.7550 |
| 2015.83 | 13.03 | 1570.1 | 120.50 | 0.7596 |
| 2015.92 | 13.13 | 1570.5 | 119.60 | 0.7637 |
| 2016.00 | 13.21 | 1570.8 | 118.90 | 0.7668 |
| 2016.08 | 13.27 | 1571.1 | 118.40 | 0.7691 |
| 2016.17 | 13.33 | 1571.4 | 117.90 | 0.7720 |
| 2016.25 | 13.40 | 1571.7 | 117.30 | 0.7754 |
| 2016.33 | 13.44 | 1571.9 | 116.90 | 0.7771 |
| 2016.42 | 13.48 | 1572.2 | 116.60 | 0.7787 |
| 2016.50 | 13.50 | 1572.4 | 116.40 | 0.7801 |
| 2016.58 | 13.53 | 1572.6 | 116.30 | 0.7816 |
| 2016.67 | 13.55 | 1572.9 | 116.10 | 0.7834 |
| 2016.75 | 13.56 | 1573.1 | 116.00 | 0.7846 |
| 2016.83 | 13.57 | 1573.4 | 115.90 | 0.7858 |
| 2016.92 | 13.59 | 1573.6 | 115.80 | 0.7868 |
| 2017.00 | 13.58 | 1573.9 | 115.90 | 0.7867 |
| 2017.08 | 13.58 | 1574.2 | 115.90 | 0.7866 |
| 2017.17 | 13.60 | 1574.6 | 115.70 | 0.7877 |
| 2017.25 | 13.64 | 1575.0 | 115.50 | 0.7890 |
| 2017.33 | 13.70 | 1575.4 | 115.00 | 0.7915 |
| 2017.42 | 13.76 | 1575.8 | 114.50 | 0.7946 |
| 2017.50 | 13.84 | 1576.2 | 113.90 | 0.7977 |
| 2017.58 | 13.90 | 1576.6 | 113.40 | 0.8005 |
| 2017.67 | 13.91 | 1577.0 | 113.30 | 0.8006 |
| 2017.75 | 13.86 | 1577.5 | 113.90 | 0.7969 |
| 2017.83 | 13.75 | 1578.0 | 114.70 | 0.7914 |
| 2017.92 | 13.67 | 1578.5 | 115.50 | 0.7874 |
| 2018.00 | 13.63 | 1578.9 | 115.80 | 0.7854 |
| 2018.08 | 13.59 | 1579.3 | 116.20 | 0.7833 |
| 2018.17 | 13.53 | 1579.7 | 116.70 | 0.7803 |
| 2018.25 | 13.45 | 1580.2 | 117.50 | 0.7768 |

|         |       |        |        |        |
|---------|-------|--------|--------|--------|
| 2018.33 | 13.35 | 1580.7 | 118.40 | 0.7723 |
| 2018.42 | 13.24 | 1581.3 | 119.40 | 0.7673 |
| 2018.50 | 13.21 | 1581.8 | 119.80 | 0.7661 |
| 2018.58 | 13.30 | 1582.3 | 119.00 | 0.7714 |
| 2018.67 | 13.41 | 1582.8 | 118.00 | 0.7771 |
| 2018.75 | 13.54 | 1583.2 | 116.90 | 0.7844 |
| 2018.83 | 13.70 | 1583.5 | 115.60 | 0.7923 |
| 2018.92 | 13.81 | 1583.9 | 114.70 | 0.7983 |
| 2019.00 | 13.86 | 1584.3 | 114.30 | 0.8011 |
| 2019.08 | 13.87 | 1584.7 | 114.20 | 0.8027 |
| 2019.17 | 13.88 | 1585.1 | 114.20 | 0.8033 |
| 2019.25 | 13.93 | 1585.4 | 113.80 | 0.8056 |
| 2019.33 | 14.04 | 1585.7 | 112.90 | 0.8108 |
| 2019.42 | 14.16 | 1586.1 | 112.00 | 0.8165 |
| 2019.50 | 14.25 | 1586.4 | 111.40 | 0.8208 |
| 2019.58 | 14.24 | 1586.6 | 111.40 | 0.8203 |
| 2019.67 | 14.20 | 1587.0 | 111.80 | 0.8181 |
| 2019.75 | 14.14 | 1587.3 | 112.20 | 0.8152 |
| 2019.83 | 14.12 | 1587.8 | 112.50 | 0.8132 |
| 2019.92 | 14.12 | 1588.3 | 112.50 | 0.8125 |
| 2020.00 | 14.17 | 1588.8 | 112.10 | 0.8139 |
| 2020.08 | 14.22 | 1589.2 | 111.70 | 0.8158 |
| 2020.17 | 14.28 | 1589.7 | 111.30 | 0.8181 |
| 2020.25 | 14.28 | 1590.3 | 111.30 | 0.8180 |
| 2020.33 | 14.22 | 1590.8 | 111.90 | 0.8145 |
| 2020.42 | 14.14 | 1591.4 | 112.60 | 0.8100 |
| 2020.50 | 14.04 | 1591.9 | 113.40 | 0.8041 |
| 2020.58 | 13.97 | 1592.5 | 114.00 | 0.7996 |
| 2020.67 | 13.93 | 1593.0 | 114.40 | 0.7965 |
| 2020.75 | 13.86 | 1593.6 | 115.00 | 0.7929 |
| 2020.83 | 13.79 | 1594.2 | 115.60 | 0.7894 |
| 2020.92 | 13.73 | 1594.7 | 116.20 | 0.7867 |
| 2021.00 | 13.66 | 1595.2 | 116.70 | 0.7838 |
| 2021.08 | 13.60 | 1595.7 | 117.30 | 0.7808 |
| 2021.17 | 13.54 | 1596.1 | 117.90 | 0.7775 |
| 2021.25 | 13.47 | 1596.6 | 118.50 | 0.7742 |
| 2021.33 | 13.44 | 1597.0 | 118.90 | 0.7720 |
| 2021.42 | 13.45 | 1597.6 | 118.80 | 0.7724 |
| 2021.50 | 13.52 | 1598.1 | 118.20 | 0.7762 |

**Table S2.**

| year     | j-N2O 30S-30N (1e-7/s) |        |        |         |         |         |         |         |
|----------|------------------------|--------|--------|---------|---------|---------|---------|---------|
|          | fig 1E                 |        |        |         |         |         |         |         |
| pressure | 15 hPa                 | 12 hPa | 10 hPa | 8.3 hPa | 6.8 hPa | 5.6 hPa | 4.6 hPa | 3.8 hPa |
| 2005.08  | 0.156                  | 0.232  | 0.333  | 0.459   | 0.612   | 0.787   | 0.979   | 1.179   |
| 2005.17  | 0.156                  | 0.233  | 0.334  | 0.460   | 0.613   | 0.788   | 0.980   | 1.180   |
| 2005.25  | 0.156                  | 0.233  | 0.334  | 0.461   | 0.614   | 0.789   | 0.980   | 1.180   |
| 2005.33  | 0.156                  | 0.233  | 0.334  | 0.462   | 0.615   | 0.789   | 0.980   | 1.180   |
| 2005.42  | 0.156                  | 0.233  | 0.335  | 0.462   | 0.615   | 0.789   | 0.980   | 1.179   |
| 2005.50  | 0.156                  | 0.233  | 0.334  | 0.461   | 0.613   | 0.787   | 0.977   | 1.177   |
| 2005.58  | 0.155                  | 0.232  | 0.333  | 0.459   | 0.611   | 0.785   | 0.975   | 1.175   |
| 2005.67  | 0.156                  | 0.233  | 0.334  | 0.460   | 0.612   | 0.786   | 0.976   | 1.176   |
| 2005.75  | 0.156                  | 0.234  | 0.335  | 0.461   | 0.613   | 0.787   | 0.977   | 1.176   |
| 2005.83  | 0.157                  | 0.235  | 0.336  | 0.462   | 0.613   | 0.787   | 0.976   | 1.176   |
| 2005.92  | 0.158                  | 0.235  | 0.336  | 0.462   | 0.613   | 0.786   | 0.976   | 1.175   |
| 2006.00  | 0.158                  | 0.236  | 0.337  | 0.462   | 0.613   | 0.786   | 0.975   | 1.175   |
| 2006.08  | 0.159                  | 0.237  | 0.337  | 0.463   | 0.613   | 0.786   | 0.976   | 1.175   |
| 2006.17  | 0.160                  | 0.237  | 0.338  | 0.463   | 0.614   | 0.787   | 0.976   | 1.176   |
| 2006.25  | 0.160                  | 0.238  | 0.338  | 0.463   | 0.614   | 0.787   | 0.977   | 1.177   |
| 2006.33  | 0.160                  | 0.238  | 0.338  | 0.463   | 0.614   | 0.787   | 0.977   | 1.177   |
| 2006.42  | 0.160                  | 0.238  | 0.338  | 0.463   | 0.614   | 0.787   | 0.977   | 1.177   |
| 2006.50  | 0.161                  | 0.238  | 0.339  | 0.464   | 0.615   | 0.789   | 0.979   | 1.179   |
| 2006.58  | 0.161                  | 0.239  | 0.339  | 0.465   | 0.616   | 0.791   | 0.981   | 1.181   |
| 2006.67  | 0.161                  | 0.238  | 0.338  | 0.464   | 0.615   | 0.789   | 0.980   | 1.180   |
| 2006.75  | 0.160                  | 0.237  | 0.337  | 0.463   | 0.615   | 0.789   | 0.980   | 1.180   |
| 2006.83  | 0.159                  | 0.237  | 0.337  | 0.463   | 0.615   | 0.789   | 0.980   | 1.180   |
| 2006.92  | 0.159                  | 0.236  | 0.336  | 0.463   | 0.615   | 0.790   | 0.981   | 1.181   |
| 2007.00  | 0.158                  | 0.236  | 0.336  | 0.463   | 0.616   | 0.790   | 0.982   | 1.182   |
| 2007.08  | 0.158                  | 0.235  | 0.336  | 0.462   | 0.615   | 0.790   | 0.981   | 1.182   |
| 2007.17  | 0.158                  | 0.235  | 0.336  | 0.462   | 0.615   | 0.789   | 0.981   | 1.181   |
| 2007.25  | 0.158                  | 0.235  | 0.336  | 0.462   | 0.615   | 0.789   | 0.980   | 1.180   |
| 2007.33  | 0.158                  | 0.235  | 0.337  | 0.463   | 0.615   | 0.788   | 0.979   | 1.180   |
| 2007.42  | 0.158                  | 0.236  | 0.337  | 0.463   | 0.615   | 0.789   | 0.980   | 1.180   |
| 2007.50  | 0.158                  | 0.236  | 0.338  | 0.464   | 0.616   | 0.790   | 0.981   | 1.181   |
| 2007.58  | 0.158                  | 0.236  | 0.338  | 0.464   | 0.615   | 0.789   | 0.980   | 1.180   |
| 2007.67  | 0.158                  | 0.236  | 0.337  | 0.463   | 0.615   | 0.788   | 0.979   | 1.179   |
| 2007.75  | 0.158                  | 0.236  | 0.337  | 0.463   | 0.614   | 0.787   | 0.978   | 1.178   |
| 2007.83  | 0.159                  | 0.237  | 0.338  | 0.463   | 0.614   | 0.787   | 0.977   | 1.178   |
| 2007.92  | 0.159                  | 0.238  | 0.338  | 0.463   | 0.614   | 0.786   | 0.977   | 1.178   |
| 2008.00  | 0.160                  | 0.238  | 0.338  | 0.463   | 0.613   | 0.786   | 0.977   | 1.178   |
| 2008.08  | 0.160                  | 0.239  | 0.339  | 0.464   | 0.614   | 0.787   | 0.978   | 1.179   |
| 2008.17  | 0.161                  | 0.239  | 0.340  | 0.465   | 0.615   | 0.788   | 0.979   | 1.180   |
| 2008.25  | 0.161                  | 0.239  | 0.340  | 0.465   | 0.616   | 0.789   | 0.980   | 1.181   |
| 2008.33  | 0.161                  | 0.239  | 0.339  | 0.464   | 0.615   | 0.789   | 0.980   | 1.181   |
| 2008.42  | 0.160                  | 0.238  | 0.339  | 0.464   | 0.615   | 0.789   | 0.980   | 1.182   |
| 2008.50  | 0.160                  | 0.238  | 0.338  | 0.463   | 0.615   | 0.789   | 0.980   | 1.181   |
| 2008.58  | 0.160                  | 0.238  | 0.338  | 0.463   | 0.615   | 0.789   | 0.980   | 1.181   |
| 2008.67  | 0.160                  | 0.238  | 0.338  | 0.464   | 0.616   | 0.791   | 0.983   | 1.184   |
| 2008.75  | 0.160                  | 0.238  | 0.339  | 0.465   | 0.618   | 0.793   | 0.985   | 1.186   |
| 2008.83  | 0.159                  | 0.237  | 0.339  | 0.465   | 0.618   | 0.793   | 0.986   | 1.187   |
| 2008.92  | 0.159                  | 0.237  | 0.338  | 0.465   | 0.618   | 0.794   | 0.986   | 1.187   |
| 2009.00  | 0.158                  | 0.236  | 0.337  | 0.465   | 0.618   | 0.794   | 0.986   | 1.187   |
| 2009.08  | 0.158                  | 0.236  | 0.337  | 0.465   | 0.618   | 0.794   | 0.986   | 1.187   |
| 2009.17  | 0.158                  | 0.236  | 0.337  | 0.465   | 0.618   | 0.793   | 0.985   | 1.186   |
| 2009.25  | 0.158                  | 0.236  | 0.337  | 0.465   | 0.618   | 0.793   | 0.985   | 1.186   |
| 2009.33  | 0.158                  | 0.236  | 0.338  | 0.466   | 0.619   | 0.793   | 0.985   | 1.186   |
| 2009.42  | 0.158                  | 0.236  | 0.339  | 0.466   | 0.619   | 0.793   | 0.984   | 1.185   |
| 2009.50  | 0.158                  | 0.236  | 0.338  | 0.465   | 0.618   | 0.792   | 0.983   | 1.183   |
| 2009.58  | 0.158                  | 0.236  | 0.338  | 0.466   | 0.618   | 0.791   | 0.982   | 1.183   |
| 2009.67  | 0.158                  | 0.236  | 0.338  | 0.465   | 0.617   | 0.791   | 0.981   | 1.182   |
| 2009.75  | 0.157                  | 0.236  | 0.338  | 0.465   | 0.617   | 0.790   | 0.981   | 1.182   |
| 2009.83  | 0.157                  | 0.236  | 0.339  | 0.465   | 0.617   | 0.790   | 0.980   | 1.181   |
| 2009.92  | 0.158                  | 0.236  | 0.339  | 0.466   | 0.617   | 0.790   | 0.981   | 1.182   |
| 2010.00  | 0.158                  | 0.237  | 0.339  | 0.466   | 0.617   | 0.790   | 0.980   | 1.181   |
| 2010.08  | 0.158                  | 0.237  | 0.339  | 0.465   | 0.616   | 0.788   | 0.978   | 1.179   |
| 2010.17  | 0.158                  | 0.236  | 0.338  | 0.464   | 0.615   | 0.787   | 0.977   | 1.178   |
| 2010.25  | 0.158                  | 0.236  | 0.338  | 0.464   | 0.614   | 0.787   | 0.977   | 1.177   |
| 2010.33  | 0.158                  | 0.236  | 0.338  | 0.463   | 0.614   | 0.786   | 0.976   | 1.176   |
| 2010.42  | 0.158                  | 0.236  | 0.338  | 0.463   | 0.613   | 0.785   | 0.975   | 1.175   |
| 2010.50  | 0.158                  | 0.236  | 0.337  | 0.462   | 0.612   | 0.785   | 0.975   | 1.175   |
| 2010.58  | 0.158                  | 0.236  | 0.336  | 0.461   | 0.611   | 0.784   | 0.974   | 1.175   |
| 2010.67  | 0.157                  | 0.235  | 0.335  | 0.460   | 0.610   | 0.782   | 0.973   | 1.174   |
| 2010.75  | 0.157                  | 0.234  | 0.334  | 0.459   | 0.609   | 0.781   | 0.971   | 1.173   |
| 2010.83  | 0.157                  | 0.234  | 0.333  | 0.458   | 0.608   | 0.781   | 0.971   | 1.172   |

|         |       |       |       |       |       |       |       |       |
|---------|-------|-------|-------|-------|-------|-------|-------|-------|
| 2010.92 | 0.156 | 0.233 | 0.333 | 0.457 | 0.608 | 0.781 | 0.971 | 1.172 |
| 2011.00 | 0.156 | 0.233 | 0.332 | 0.457 | 0.608 | 0.781 | 0.971 | 1.172 |
| 2011.08 | 0.156 | 0.233 | 0.333 | 0.458 | 0.609 | 0.782 | 0.973 | 1.175 |
| 2011.17 | 0.156 | 0.233 | 0.333 | 0.459 | 0.610 | 0.783 | 0.973 | 1.175 |
| 2011.25 | 0.156 | 0.233 | 0.333 | 0.459 | 0.610 | 0.784 | 0.974 | 1.176 |
| 2011.33 | 0.156 | 0.233 | 0.333 | 0.459 | 0.611 | 0.784 | 0.975 | 1.177 |
| 2011.42 | 0.155 | 0.232 | 0.333 | 0.460 | 0.611 | 0.785 | 0.976 | 1.178 |
| 2011.50 | 0.156 | 0.233 | 0.334 | 0.461 | 0.613 | 0.786 | 0.977 | 1.179 |
| 2011.58 | 0.156 | 0.233 | 0.335 | 0.462 | 0.613 | 0.787 | 0.978 | 1.180 |
| 2011.67 | 0.156 | 0.234 | 0.336 | 0.463 | 0.615 | 0.789 | 0.979 | 1.181 |
| 2011.75 | 0.156 | 0.234 | 0.336 | 0.464 | 0.615 | 0.789 | 0.979 | 1.181 |
| 2011.83 | 0.156 | 0.234 | 0.337 | 0.464 | 0.615 | 0.788 | 0.979 | 1.181 |
| 2011.92 | 0.157 | 0.235 | 0.337 | 0.464 | 0.615 | 0.788 | 0.978 | 1.180 |
| 2012.00 | 0.157 | 0.235 | 0.337 | 0.464 | 0.615 | 0.788 | 0.978 | 1.180 |
| 2012.08 | 0.157 | 0.235 | 0.337 | 0.463 | 0.614 | 0.786 | 0.976 | 1.178 |
| 2012.17 | 0.157 | 0.235 | 0.337 | 0.462 | 0.613 | 0.785 | 0.975 | 1.177 |
| 2012.25 | 0.157 | 0.235 | 0.336 | 0.461 | 0.611 | 0.783 | 0.973 | 1.175 |
| 2012.33 | 0.157 | 0.235 | 0.336 | 0.461 | 0.611 | 0.783 | 0.973 | 1.175 |
| 2012.42 | 0.158 | 0.236 | 0.336 | 0.462 | 0.612 | 0.784 | 0.974 | 1.175 |
| 2012.50 | 0.158 | 0.236 | 0.337 | 0.462 | 0.612 | 0.784 | 0.974 | 1.176 |
| 2012.58 | 0.158 | 0.236 | 0.337 | 0.462 | 0.612 | 0.784 | 0.974 | 1.175 |
| 2012.67 | 0.158 | 0.236 | 0.337 | 0.462 | 0.612 | 0.784 | 0.974 | 1.175 |
| 2012.75 | 0.159 | 0.237 | 0.337 | 0.461 | 0.611 | 0.784 | 0.974 | 1.175 |
| 2012.83 | 0.159 | 0.237 | 0.337 | 0.461 | 0.611 | 0.783 | 0.973 | 1.175 |
| 2012.92 | 0.159 | 0.237 | 0.337 | 0.461 | 0.610 | 0.782 | 0.972 | 1.174 |
| 2013.00 | 0.159 | 0.237 | 0.337 | 0.461 | 0.610 | 0.782 | 0.972 | 1.173 |
| 2013.08 | 0.159 | 0.237 | 0.337 | 0.460 | 0.610 | 0.782 | 0.972 | 1.174 |
| 2013.17 | 0.159 | 0.237 | 0.336 | 0.460 | 0.609 | 0.781 | 0.972 | 1.174 |
| 2013.25 | 0.159 | 0.236 | 0.335 | 0.459 | 0.609 | 0.781 | 0.972 | 1.174 |
| 2013.33 | 0.158 | 0.235 | 0.334 | 0.458 | 0.607 | 0.780 | 0.971 | 1.174 |
| 2013.42 | 0.158 | 0.234 | 0.333 | 0.457 | 0.606 | 0.779 | 0.971 | 1.173 |
| 2013.50 | 0.158 | 0.234 | 0.332 | 0.456 | 0.605 | 0.779 | 0.970 | 1.173 |
| 2013.58 | 0.158 | 0.234 | 0.332 | 0.456 | 0.606 | 0.780 | 0.971 | 1.174 |
| 2013.67 | 0.157 | 0.233 | 0.331 | 0.455 | 0.605 | 0.778 | 0.970 | 1.173 |
| 2013.75 | 0.156 | 0.232 | 0.330 | 0.454 | 0.604 | 0.777 | 0.969 | 1.172 |
| 2013.83 | 0.155 | 0.231 | 0.329 | 0.453 | 0.603 | 0.777 | 0.969 | 1.172 |
| 2013.92 | 0.155 | 0.230 | 0.328 | 0.452 | 0.603 | 0.778 | 0.970 | 1.173 |
| 2014.00 | 0.154 | 0.230 | 0.328 | 0.452 | 0.604 | 0.778 | 0.971 | 1.174 |
| 2014.08 | 0.154 | 0.229 | 0.328 | 0.452 | 0.604 | 0.778 | 0.970 | 1.174 |
| 2014.17 | 0.154 | 0.229 | 0.327 | 0.452 | 0.604 | 0.778 | 0.971 | 1.174 |
| 2014.25 | 0.154 | 0.229 | 0.327 | 0.452 | 0.604 | 0.778 | 0.970 | 1.173 |
| 2014.33 | 0.153 | 0.229 | 0.328 | 0.453 | 0.605 | 0.779 | 0.970 | 1.173 |
| 2014.42 | 0.153 | 0.228 | 0.328 | 0.453 | 0.604 | 0.778 | 0.969 | 1.172 |
| 2014.50 | 0.153 | 0.228 | 0.327 | 0.452 | 0.603 | 0.776 | 0.967 | 1.170 |
| 2014.58 | 0.152 | 0.228 | 0.327 | 0.452 | 0.603 | 0.776 | 0.966 | 1.169 |
| 2014.67 | 0.153 | 0.228 | 0.327 | 0.452 | 0.603 | 0.776 | 0.966 | 1.169 |
| 2014.75 | 0.153 | 0.229 | 0.328 | 0.454 | 0.604 | 0.777 | 0.967 | 1.170 |
| 2014.83 | 0.153 | 0.229 | 0.329 | 0.454 | 0.605 | 0.777 | 0.967 | 1.169 |
| 2014.92 | 0.154 | 0.230 | 0.330 | 0.455 | 0.605 | 0.777 | 0.967 | 1.169 |
| 2015.00 | 0.154 | 0.230 | 0.330 | 0.455 | 0.605 | 0.777 | 0.967 | 1.168 |
| 2015.08 | 0.154 | 0.231 | 0.330 | 0.455 | 0.606 | 0.778 | 0.968 | 1.169 |
| 2015.17 | 0.155 | 0.231 | 0.331 | 0.456 | 0.606 | 0.779 | 0.969 | 1.170 |
| 2015.25 | 0.155 | 0.232 | 0.332 | 0.457 | 0.607 | 0.779 | 0.969 | 1.171 |
| 2015.33 | 0.156 | 0.233 | 0.333 | 0.457 | 0.607 | 0.779 | 0.969 | 1.171 |
| 2015.42 | 0.157 | 0.233 | 0.333 | 0.457 | 0.607 | 0.780 | 0.970 | 1.172 |
| 2015.50 | 0.157 | 0.234 | 0.334 | 0.458 | 0.608 | 0.781 | 0.972 | 1.174 |
| 2015.58 | 0.157 | 0.234 | 0.334 | 0.458 | 0.609 | 0.782 | 0.973 | 1.175 |
| 2015.67 | 0.157 | 0.234 | 0.333 | 0.458 | 0.609 | 0.782 | 0.973 | 1.175 |
| 2015.75 | 0.156 | 0.233 | 0.332 | 0.456 | 0.607 | 0.781 | 0.972 | 1.175 |
| 2015.83 | 0.156 | 0.232 | 0.331 | 0.456 | 0.607 | 0.781 | 0.973 | 1.176 |
| 2015.92 | 0.156 | 0.232 | 0.331 | 0.455 | 0.606 | 0.781 | 0.973 | 1.176 |
| 2016.00 | 0.156 | 0.232 | 0.330 | 0.454 | 0.606 | 0.781 | 0.973 | 1.175 |
| 2016.08 | 0.156 | 0.232 | 0.330 | 0.454 | 0.606 | 0.780 | 0.972 | 1.175 |
| 2016.17 | 0.156 | 0.231 | 0.329 | 0.453 | 0.604 | 0.779 | 0.971 | 1.174 |
| 2016.25 | 0.156 | 0.231 | 0.329 | 0.453 | 0.605 | 0.779 | 0.971 | 1.174 |
| 2016.33 | 0.156 | 0.231 | 0.329 | 0.454 | 0.605 | 0.780 | 0.972 | 1.175 |
| 2016.42 | 0.156 | 0.231 | 0.329 | 0.453 | 0.605 | 0.780 | 0.972 | 1.175 |
| 2016.50 | 0.155 | 0.231 | 0.329 | 0.453 | 0.605 | 0.779 | 0.972 | 1.175 |
| 2016.58 | 0.155 | 0.231 | 0.329 | 0.453 | 0.604 | 0.779 | 0.971 | 1.174 |
| 2016.67 | 0.155 | 0.231 | 0.328 | 0.452 | 0.604 | 0.778 | 0.970 | 1.173 |
| 2016.75 | 0.156 | 0.231 | 0.329 | 0.453 | 0.604 | 0.779 | 0.971 | 1.173 |
| 2016.83 | 0.156 | 0.231 | 0.329 | 0.453 | 0.603 | 0.778 | 0.970 | 1.173 |
| 2016.92 | 0.155 | 0.231 | 0.329 | 0.453 | 0.604 | 0.778 | 0.970 | 1.173 |
| 2017.00 | 0.155 | 0.231 | 0.329 | 0.453 | 0.604 | 0.778 | 0.971 | 1.173 |
| 2017.08 | 0.155 | 0.230 | 0.329 | 0.453 | 0.604 | 0.778 | 0.970 | 1.172 |

|         |       |       |       |       |       |       |       |       |
|---------|-------|-------|-------|-------|-------|-------|-------|-------|
| 2017.17 | 0.155 | 0.230 | 0.328 | 0.453 | 0.604 | 0.778 | 0.970 | 1.173 |
| 2017.25 | 0.154 | 0.230 | 0.328 | 0.453 | 0.604 | 0.779 | 0.971 | 1.173 |
| 2017.33 | 0.154 | 0.229 | 0.328 | 0.453 | 0.605 | 0.779 | 0.971 | 1.173 |
| 2017.42 | 0.154 | 0.230 | 0.329 | 0.454 | 0.605 | 0.780 | 0.971 | 1.173 |
| 2017.50 | 0.154 | 0.230 | 0.329 | 0.455 | 0.607 | 0.781 | 0.972 | 1.174 |
| 2017.58 | 0.154 | 0.230 | 0.330 | 0.456 | 0.608 | 0.782 | 0.973 | 1.174 |
| 2017.67 | 0.154 | 0.231 | 0.331 | 0.457 | 0.608 | 0.782 | 0.973 | 1.174 |
| 2017.75 | 0.155 | 0.232 | 0.332 | 0.458 | 0.610 | 0.784 | 0.974 | 1.176 |
| 2017.83 | 0.155 | 0.232 | 0.333 | 0.460 | 0.612 | 0.785 | 0.976 | 1.177 |
| 2017.92 | 0.155 | 0.233 | 0.334 | 0.460 | 0.612 | 0.785 | 0.976 | 1.177 |
| 2018.00 | 0.156 | 0.234 | 0.335 | 0.461 | 0.613 | 0.786 | 0.976 | 1.177 |
| 2018.08 | 0.157 | 0.235 | 0.336 | 0.463 | 0.614 | 0.787 | 0.978 | 1.179 |
| 2018.17 | 0.157 | 0.236 | 0.337 | 0.464 | 0.615 | 0.788 | 0.979 | 1.180 |
| 2018.25 | 0.158 | 0.236 | 0.338 | 0.464 | 0.615 | 0.788 | 0.978 | 1.179 |
| 2018.33 | 0.158 | 0.237 | 0.339 | 0.464 | 0.615 | 0.787 | 0.977 | 1.179 |
| 2018.42 | 0.159 | 0.237 | 0.339 | 0.464 | 0.615 | 0.787 | 0.977 | 1.178 |
| 2018.50 | 0.158 | 0.237 | 0.338 | 0.463 | 0.612 | 0.784 | 0.974 | 1.175 |
| 2018.58 | 0.158 | 0.236 | 0.337 | 0.461 | 0.611 | 0.783 | 0.972 | 1.173 |
| 2018.67 | 0.159 | 0.236 | 0.337 | 0.461 | 0.611 | 0.783 | 0.973 | 1.173 |
| 2018.75 | 0.159 | 0.236 | 0.336 | 0.460 | 0.609 | 0.781 | 0.971 | 1.171 |
| 2018.83 | 0.158 | 0.236 | 0.335 | 0.458 | 0.607 | 0.779 | 0.969 | 1.170 |
| 2018.92 | 0.158 | 0.235 | 0.334 | 0.457 | 0.606 | 0.778 | 0.969 | 1.170 |
| 2019.00 | 0.158 | 0.235 | 0.333 | 0.456 | 0.606 | 0.778 | 0.968 | 1.169 |
| 2019.08 | 0.157 | 0.234 | 0.332 | 0.455 | 0.604 | 0.776 | 0.966 | 1.167 |
| 2019.17 | 0.157 | 0.233 | 0.331 | 0.454 | 0.604 | 0.776 | 0.966 | 1.167 |
| 2019.25 | 0.156 | 0.231 | 0.329 | 0.453 | 0.602 | 0.775 | 0.966 | 1.166 |
| 2019.33 | 0.155 | 0.231 | 0.329 | 0.452 | 0.603 | 0.776 | 0.967 | 1.167 |
| 2019.42 | 0.155 | 0.230 | 0.328 | 0.452 | 0.603 | 0.777 | 0.967 | 1.168 |
| 2019.50 | 0.155 | 0.230 | 0.328 | 0.453 | 0.604 | 0.778 | 0.969 | 1.170 |
| 2019.58 | 0.155 | 0.230 | 0.328 | 0.453 | 0.605 | 0.779 | 0.970 | 1.171 |
| 2019.67 | 0.154 | 0.230 | 0.328 | 0.453 | 0.605 | 0.779 | 0.970 | 1.171 |
| 2019.75 | 0.154 | 0.230 | 0.329 | 0.454 | 0.606 | 0.780 | 0.971 | 1.172 |
| 2019.83 | 0.154 | 0.229 | 0.329 | 0.455 | 0.607 | 0.781 | 0.972 | 1.173 |
| 2019.92 | 0.154 | 0.230 | 0.329 | 0.455 | 0.608 | 0.782 | 0.972 | 1.173 |
| 2020.00 | 0.154 | 0.230 | 0.329 | 0.455 | 0.608 | 0.782 | 0.972 | 1.173 |
| 2020.08 | 0.154 | 0.230 | 0.330 | 0.456 | 0.608 | 0.781 | 0.972 | 1.172 |
| 2020.17 | 0.154 | 0.230 | 0.330 | 0.456 | 0.607 | 0.781 | 0.971 | 1.172 |
| 2020.25 | 0.155 | 0.231 | 0.332 | 0.457 | 0.609 | 0.782 | 0.972 | 1.173 |
| 2020.33 | 0.155 | 0.232 | 0.332 | 0.458 | 0.608 | 0.781 | 0.971 | 1.172 |
| 2020.42 | 0.156 | 0.233 | 0.333 | 0.458 | 0.608 | 0.781 | 0.971 | 1.171 |
| 2020.50 | 0.156 | 0.233 | 0.333 | 0.458 | 0.609 | 0.781 | 0.971 | 1.171 |
| 2020.58 | 0.156 | 0.233 | 0.333 | 0.458 | 0.608 | 0.780 | 0.970 | 1.170 |
| 2020.67 | 0.156 | 0.233 | 0.333 | 0.459 | 0.609 | 0.781 | 0.971 | 1.172 |
| 2020.75 | 0.156 | 0.233 | 0.334 | 0.459 | 0.610 | 0.782 | 0.972 | 1.172 |
| 2020.83 | 0.156 | 0.233 | 0.334 | 0.459 | 0.610 | 0.782 | 0.972 | 1.172 |
| 2020.92 | 0.156 | 0.233 | 0.334 | 0.459 | 0.610 | 0.782 | 0.972 | 1.172 |
| 2021.00 | 0.156 | 0.233 | 0.334 | 0.459 | 0.610 | 0.783 | 0.972 | 1.173 |
| 2021.08 | 0.156 | 0.234 | 0.334 | 0.460 | 0.611 | 0.783 | 0.973 | 1.174 |
| 2021.17 | 0.157 | 0.234 | 0.335 | 0.461 | 0.612 | 0.784 | 0.974 | 1.174 |
| 2021.25 | 0.157 | 0.234 | 0.335 | 0.461 | 0.612 | 0.784 | 0.974 | 1.174 |
| 2021.33 | 0.157 | 0.234 | 0.335 | 0.461 | 0.612 | 0.784 | 0.974 | 1.174 |
| 2021.42 | 0.157 | 0.234 | 0.335 | 0.461 | 0.612 | 0.783 | 0.973 | 1.173 |
| 2021.50 | 0.157 | 0.235 | 0.335 | 0.461 | 0.611 | 0.783 | 0.973 | 1.173 |



**Table S3.**

| year    | f-N <sub>2</sub> O 30S-30N (ppb) |        |        |        |         |         |         |
|---------|----------------------------------|--------|--------|--------|---------|---------|---------|
|         | <b>fig 1F</b>                    |        |        |        |         |         |         |
|         | 32 hPa                           | 22 hPa | 15 hPa | 10 hPa | 6.8 hPa | 4.6 hPa | 3.2 hPa |
| 2005.08 | 209.19                           | 203.02 | 196.73 | 163.04 | 119.83  | 78.55   | 47.37   |
| 2005.17 | 209.30                           | 202.90 | 197.61 | 163.83 | 118.97  | 77.17   | 47.20   |
| 2005.25 | 209.53                           | 202.84 | 198.29 | 164.44 | 118.00  | 75.29   | 46.34   |
| 2005.33 | 210.19                           | 203.06 | 198.64 | 164.67 | 116.99  | 73.36   | 45.12   |
| 2005.42 | 210.93                           | 203.63 | 199.30 | 164.96 | 116.25  | 71.88   | 43.89   |
| 2005.50 | 211.78                           | 204.24 | 199.80 | 165.25 | 116.48  | 72.45   | 44.72   |
| 2005.58 | 212.87                           | 204.81 | 199.93 | 165.33 | 117.16  | 74.19   | 47.06   |
| 2005.67 | 214.05                           | 205.29 | 199.55 | 164.47 | 116.87  | 75.31   | 49.26   |
| 2005.75 | 215.03                           | 205.43 | 198.20 | 162.12 | 115.07  | 75.17   | 50.48   |
| 2005.83 | 216.01                           | 205.67 | 196.80 | 159.30 | 112.59  | 74.39   | 51.05   |
| 2005.92 | 216.89                           | 205.97 | 195.42 | 156.28 | 109.81  | 73.27   | 51.23   |
| 2006.00 | 217.68                           | 206.34 | 194.12 | 153.47 | 107.20  | 71.93   | 50.87   |
| 2006.08 | 218.10                           | 206.40 | 192.79 | 151.46 | 105.56  | 70.59   | 49.67   |
| 2006.17 | 218.21                           | 206.21 | 191.61 | 150.28 | 104.91  | 69.46   | 47.79   |
| 2006.25 | 218.25                           | 205.85 | 190.38 | 149.52 | 105.24  | 69.35   | 46.34   |
| 2006.33 | 218.06                           | 205.31 | 189.33 | 148.94 | 105.75  | 69.85   | 45.80   |
| 2006.42 | 217.48                           | 204.58 | 188.34 | 148.47 | 106.29  | 70.64   | 45.99   |
| 2006.50 | 217.04                           | 204.33 | 188.12 | 148.37 | 106.18  | 70.00   | 44.88   |
| 2006.58 | 216.46                           | 204.26 | 188.69 | 149.11 | 106.30  | 68.83   | 42.75   |
| 2006.67 | 215.84                           | 204.38 | 189.93 | 150.80 | 107.29  | 68.30   | 40.91   |
| 2006.75 | 215.23                           | 204.73 | 192.06 | 153.87 | 109.56  | 68.86   | 40.05   |
| 2006.83 | 214.40                           | 204.79 | 194.07 | 157.19 | 112.22  | 69.78   | 39.79   |
| 2006.92 | 213.76                           | 204.92 | 195.97 | 160.50 | 115.00  | 70.90   | 39.76   |
| 2007.00 | 213.37                           | 205.02 | 197.43 | 163.09 | 117.37  | 72.20   | 40.15   |
| 2007.08 | 213.39                           | 205.48 | 198.78 | 164.54 | 118.60  | 73.49   | 41.36   |
| 2007.17 | 213.76                           | 206.55 | 200.19 | 164.97 | 118.49  | 74.40   | 43.25   |
| 2007.25 | 214.34                           | 207.90 | 201.78 | 164.89 | 117.02  | 73.99   | 44.68   |
| 2007.33 | 214.92                           | 209.30 | 203.48 | 165.09 | 115.59  | 73.00   | 45.28   |
| 2007.42 | 215.61                           | 210.61 | 204.94 | 165.38 | 114.33  | 71.49   | 44.75   |
| 2007.50 | 216.19                           | 211.27 | 205.28 | 165.22 | 113.88  | 71.07   | 44.42   |
| 2007.58 | 216.71                           | 211.46 | 204.55 | 164.18 | 113.64  | 72.03   | 45.80   |
| 2007.67 | 217.35                           | 211.55 | 203.51 | 162.86 | 113.35  | 73.32   | 48.23   |
| 2007.75 | 218.09                           | 211.54 | 202.09 | 160.78 | 112.17  | 73.92   | 50.30   |
| 2007.83 | 219.00                           | 211.66 | 200.54 | 158.17 | 110.35  | 73.99   | 51.69   |
| 2007.92 | 219.86                           | 211.79 | 198.97 | 155.31 | 108.17  | 73.62   | 52.47   |
| 2008.00 | 220.42                           | 212.09 | 197.81 | 152.87 | 106.21  | 73.09   | 52.80   |
| 2008.08 | 220.63                           | 212.09 | 196.70 | 151.25 | 105.03  | 72.37   | 52.13   |
| 2008.17 | 220.48                           | 211.43 | 195.63 | 150.63 | 104.75  | 71.54   | 50.52   |
| 2008.25 | 220.00                           | 210.44 | 194.71 | 150.88 | 105.62  | 71.40   | 49.01   |
| 2008.33 | 219.51                           | 209.39 | 193.77 | 151.41 | 107.39  | 72.54   | 48.53   |
| 2008.42 | 219.00                           | 208.40 | 192.98 | 151.90 | 109.24  | 74.28   | 49.04   |
| 2008.50 | 218.32                           | 207.76 | 192.96 | 152.73 | 110.46  | 75.19   | 49.46   |
| 2008.58 | 217.40                           | 207.31 | 193.91 | 154.33 | 111.26  | 74.61   | 48.24   |
| 2008.67 | 216.36                           | 206.75 | 195.29 | 156.63 | 112.43  | 73.73   | 45.85   |
| 2008.75 | 214.87                           | 206.00 | 196.61 | 158.97 | 113.58  | 72.59   | 43.09   |
| 2008.83 | 213.28                           | 205.11 | 197.87 | 161.60 | 115.25  | 72.01   | 41.08   |
| 2008.92 | 211.93                           | 204.18 | 199.01 | 164.45 | 117.49  | 72.26   | 40.00   |
| 2009.00 | 210.94                           | 203.34 | 200.10 | 167.28 | 119.85  | 72.84   | 39.43   |
| 2009.08 | 210.39                           | 202.98 | 201.03 | 169.17 | 121.25  | 73.21   | 39.36   |
| 2009.17 | 210.16                           | 203.16 | 201.70 | 169.74 | 121.37  | 73.25   | 39.75   |
| 2009.25 | 210.19                           | 203.79 | 202.42 | 169.47 | 120.35  | 72.76   | 40.26   |
| 2009.33 | 210.23                           | 204.62 | 203.38 | 169.00 | 118.42  | 71.10   | 39.89   |
| 2009.42 | 210.25                           | 205.46 | 204.57 | 169.04 | 117.04  | 69.57   | 39.16   |
| 2009.50 | 210.48                           | 206.08 | 205.64 | 169.41 | 116.59  | 69.39   | 39.63   |
| 2009.58 | 211.01                           | 206.81 | 206.29 | 169.24 | 115.86  | 69.34   | 40.64   |
| 2009.67 | 211.78                           | 207.73 | 206.60 | 168.68 | 114.80  | 68.98   | 41.64   |
| 2009.75 | 212.88                           | 208.86 | 207.04 | 168.24 | 113.68  | 68.30   | 42.15   |
| 2009.83 | 214.12                           | 210.12 | 207.68 | 168.05 | 112.68  | 67.42   | 42.09   |
| 2009.92 | 215.29                           | 211.39 | 208.16 | 167.63 | 111.72  | 66.46   | 41.55   |
| 2010.00 | 216.40                           | 212.64 | 208.20 | 166.57 | 110.51  | 65.63   | 41.15   |
| 2010.08 | 217.26                           | 213.51 | 208.03 | 165.44 | 109.67  | 65.74   | 41.72   |
| 2010.17 | 218.01                           | 214.20 | 208.02 | 164.84 | 109.64  | 66.91   | 43.41   |
| 2010.25 | 218.52                           | 214.39 | 207.57 | 164.04 | 109.44  | 67.72   | 44.76   |
| 2010.33 | 218.81                           | 214.16 | 206.70 | 163.07 | 109.13  | 68.37   | 46.05   |
| 2010.42 | 218.84                           | 213.65 | 205.50 | 161.89 | 108.62  | 68.78   | 47.08   |
| 2010.50 | 218.76                           | 213.36 | 204.55 | 161.32 | 108.96  | 69.34   | 47.23   |
| 2010.58 | 218.53                           | 212.98 | 203.98 | 161.73 | 110.69  | 71.38   | 48.33   |
| 2010.67 | 217.62                           | 212.11 | 203.53 | 162.46 | 112.67  | 73.64   | 50.01   |
| 2010.75 | 216.55                           | 211.02 | 203.17 | 163.58 | 115.25  | 76.47   | 52.07   |

|         |        |        |        |        |        |       |       |
|---------|--------|--------|--------|--------|--------|-------|-------|
| 2010.83 | 215.28 | 209.69 | 202.88 | 164.72 | 117.60 | 78.77 | 53.33 |
| 2010.92 | 213.87 | 208.29 | 202.86 | 166.02 | 119.58 | 80.76 | 54.79 |
| 2011.00 | 212.45 | 206.76 | 202.83 | 167.27 | 121.11 | 82.16 | 55.92 |
| 2011.08 | 211.34 | 205.49 | 202.82 | 168.31 | 122.00 | 82.49 | 56.02 |
| 2011.17 | 210.40 | 204.50 | 202.74 | 169.09 | 122.40 | 81.96 | 55.07 |
| 2011.25 | 209.62 | 203.97 | 202.94 | 169.96 | 122.93 | 81.50 | 54.08 |
| 2011.33 | 208.84 | 203.60 | 203.33 | 170.77 | 123.34 | 81.07 | 53.01 |
| 2011.42 | 208.21 | 203.42 | 203.99 | 171.76 | 123.82 | 80.77 | 52.15 |
| 2011.50 | 207.62 | 203.14 | 204.51 | 171.99 | 122.96 | 79.44 | 51.21 |
| 2011.58 | 207.37 | 202.96 | 204.94 | 171.93 | 121.58 | 77.45 | 49.78 |
| 2011.67 | 207.66 | 203.30 | 205.22 | 171.19 | 119.58 | 74.92 | 47.45 |
| 2011.75 | 208.04 | 203.98 | 205.52 | 170.35 | 117.55 | 72.42 | 45.38 |
| 2011.83 | 208.68 | 205.06 | 205.66 | 169.31 | 115.92 | 70.91 | 44.46 |
| 2011.92 | 209.36 | 206.25 | 205.50 | 167.81 | 114.27 | 69.58 | 43.41 |
| 2012.00 | 209.93 | 207.37 | 205.28 | 166.29 | 112.81 | 68.63 | 42.69 |
| 2012.08 | 210.34 | 208.31 | 205.17 | 165.17 | 111.87 | 68.31 | 42.71 |
| 2012.17 | 210.83 | 209.02 | 205.12 | 164.37 | 111.30 | 68.41 | 43.19 |
| 2012.25 | 211.43 | 209.47 | 204.88 | 163.58 | 110.88 | 68.71 | 43.82 |
| 2012.33 | 212.29 | 209.99 | 204.46 | 162.61 | 110.34 | 68.90 | 44.37 |
| 2012.42 | 213.25 | 210.57 | 203.96 | 161.18 | 108.93 | 68.20 | 44.40 |
| 2012.50 | 214.21 | 210.88 | 203.02 | 159.65 | 107.53 | 67.15 | 43.75 |
| 2012.58 | 215.17 | 211.05 | 201.71 | 158.41 | 107.61 | 67.74 | 43.79 |
| 2012.67 | 216.04 | 210.78 | 199.67 | 156.72 | 108.02 | 69.32 | 45.00 |
| 2012.75 | 217.03 | 210.42 | 197.30 | 154.31 | 107.81 | 70.97 | 46.66 |
| 2012.83 | 217.82 | 210.05 | 195.24 | 151.70 | 106.70 | 71.91 | 48.22 |
| 2012.92 | 218.78 | 209.95 | 193.86 | 149.65 | 105.31 | 72.12 | 49.44 |
| 2013.00 | 219.58 | 209.91 | 193.02 | 148.29 | 104.10 | 71.85 | 49.98 |
| 2013.08 | 220.18 | 209.84 | 192.43 | 147.77 | 103.99 | 71.89 | 49.79 |
| 2013.17 | 220.45 | 209.59 | 191.84 | 147.84 | 105.03 | 72.96 | 49.93 |
| 2013.25 | 220.50 | 209.25 | 191.40 | 148.43 | 107.02 | 75.17 | 51.00 |
| 2013.33 | 220.23 | 208.63 | 190.87 | 149.20 | 109.44 | 77.97 | 52.69 |
| 2013.42 | 219.90 | 207.89 | 190.24 | 150.08 | 112.19 | 81.07 | 54.61 |
| 2013.50 | 219.27 | 207.20 | 189.76 | 150.61 | 113.99 | 83.22 | 56.15 |
| 2013.58 | 218.27 | 206.74 | 190.01 | 150.92 | 113.64 | 82.38 | 55.43 |
| 2013.67 | 217.09 | 206.48 | 191.17 | 152.24 | 113.80 | 81.52 | 54.29 |
| 2013.75 | 215.91 | 206.13 | 192.68 | 154.48 | 115.16 | 81.66 | 53.74 |
| 2013.83 | 214.82 | 205.77 | 194.07 | 157.14 | 117.50 | 82.64 | 53.61 |
| 2013.92 | 213.56 | 205.13 | 194.94 | 159.64 | 120.26 | 84.06 | 53.67 |
| 2014.00 | 212.47 | 204.62 | 195.65 | 161.83 | 122.83 | 85.53 | 53.93 |
| 2014.08 | 211.55 | 204.45 | 196.57 | 163.53 | 124.22 | 86.19 | 54.37 |
| 2014.17 | 210.71 | 204.41 | 197.68 | 164.99 | 124.68 | 85.74 | 54.22 |
| 2014.25 | 210.12 | 204.63 | 198.83 | 166.22 | 124.57 | 84.38 | 53.15 |
| 2014.33 | 209.70 | 205.23 | 200.31 | 167.54 | 124.37 | 82.79 | 51.65 |
| 2014.42 | 209.28 | 206.01 | 202.02 | 168.81 | 124.20 | 81.55 | 50.43 |
| 2014.50 | 209.11 | 206.95 | 203.92 | 170.29 | 124.62 | 81.55 | 50.76 |
| 2014.58 | 209.33 | 207.80 | 205.20 | 171.04 | 124.84 | 82.19 | 52.25 |
| 2014.67 | 209.60 | 208.81 | 206.21 | 170.94 | 123.98 | 81.99 | 53.32 |
| 2014.75 | 209.87 | 209.90 | 206.91 | 170.02 | 121.83 | 80.28 | 52.97 |
| 2014.83 | 210.42 | 211.08 | 207.65 | 169.07 | 119.29 | 77.89 | 52.03 |
| 2014.92 | 211.14 | 212.17 | 208.35 | 168.24 | 116.93 | 75.45 | 50.68 |
| 2015.00 | 211.90 | 212.69 | 208.30 | 167.52 | 115.78 | 74.17 | 49.66 |
| 2015.08 | 212.62 | 212.63 | 207.22 | 166.55 | 115.77 | 74.32 | 49.17 |
| 2015.17 | 213.22 | 212.31 | 205.42 | 164.76 | 115.61 | 75.07 | 49.20 |
| 2015.25 | 213.43 | 211.79 | 203.36 | 162.35 | 114.93 | 76.07 | 50.04 |
| 2015.33 | 213.44 | 211.24 | 201.28 | 159.66 | 113.72 | 76.84 | 51.31 |
| 2015.42 | 213.19 | 210.60 | 199.42 | 157.39 | 112.47 | 77.07 | 52.19 |
| 2015.50 | 212.77 | 210.01 | 198.27 | 156.33 | 111.82 | 76.46 | 51.34 |
| 2015.58 | 212.00 | 209.17 | 197.60 | 156.52 | 112.29 | 75.92 | 49.52 |
| 2015.67 | 211.49 | 208.13 | 197.04 | 157.76 | 114.55 | 77.00 | 48.51 |
| 2015.75 | 211.43 | 207.01 | 196.42 | 159.62 | 118.28 | 79.99 | 49.27 |
| 2015.83 | 211.30 | 205.66 | 195.19 | 160.92 | 121.94 | 83.19 | 50.37 |
| 2015.92 | 211.11 | 204.38 | 193.75 | 161.57 | 124.88 | 86.23 | 51.90 |
| 2016.00 | 210.77 | 203.47 | 192.81 | 161.80 | 126.56 | 88.26 | 53.34 |
| 2016.08 | 210.40 | 202.95 | 192.59 | 161.81 | 126.84 | 88.98 | 54.37 |
| 2016.17 | 210.05 | 202.66 | 192.96 | 162.15 | 126.87 | 89.31 | 55.24 |
| 2016.25 | 209.80 | 202.26 | 193.47 | 162.92 | 127.18 | 89.44 | 55.69 |
| 2016.33 | 209.77 | 201.69 | 193.67 | 163.64 | 127.58 | 89.36 | 55.52 |
| 2016.42 | 210.09 | 201.16 | 193.63 | 164.18 | 128.20 | 89.73 | 55.67 |
| 2016.50 | 210.45 | 200.80 | 193.25 | 164.05 | 128.59 | 90.44 | 56.24 |
| 2016.58 | 210.66 | 200.70 | 192.88 | 163.65 | 128.71 | 91.15 | 57.11 |
| 2016.67 | 210.76 | 200.87 | 192.77 | 163.24 | 128.51 | 91.51 | 57.94 |
| 2016.75 | 210.36 | 201.18 | 192.96 | 162.75 | 127.82 | 91.26 | 58.39 |
| 2016.83 | 209.51 | 201.38 | 193.68 | 162.73 | 127.31 | 91.35 | 59.17 |
| 2016.92 | 208.51 | 201.51 | 194.71 | 163.20 | 127.16 | 91.48 | 59.68 |

|         |        |        |        |        |        |       |       |
|---------|--------|--------|--------|--------|--------|-------|-------|
| 2017.00 | 207.56 | 201.72 | 195.87 | 164.04 | 127.28 | 91.47 | 59.80 |
| 2017.08 | 206.87 | 202.08 | 197.16 | 165.46 | 128.02 | 91.52 | 59.64 |
| 2017.17 | 206.44 | 202.57 | 198.47 | 167.18 | 129.27 | 91.70 | 59.26 |
| 2017.25 | 206.12 | 203.32 | 199.88 | 169.03 | 130.66 | 91.79 | 58.53 |
| 2017.33 | 205.74 | 204.36 | 201.68 | 171.02 | 131.88 | 91.67 | 57.74 |
| 2017.42 | 205.23 | 205.54 | 203.68 | 172.74 | 132.55 | 91.29 | 56.99 |
| 2017.50 | 204.74 | 206.61 | 205.56 | 173.83 | 132.35 | 90.60 | 56.62 |
| 2017.58 | 204.33 | 207.62 | 207.24 | 174.23 | 131.14 | 89.44 | 56.63 |
| 2017.67 | 204.17 | 208.35 | 208.53 | 174.24 | 129.31 | 87.50 | 56.10 |
| 2017.75 | 204.16 | 208.95 | 209.63 | 174.10 | 127.04 | 84.57 | 54.30 |
| 2017.83 | 204.40 | 209.84 | 210.69 | 173.77 | 124.50 | 81.02 | 51.65 |
| 2017.92 | 204.90 | 210.91 | 211.63 | 173.49 | 122.47 | 78.09 | 49.31 |
| 2018.00 | 205.51 | 212.01 | 212.29 | 172.72 | 120.46 | 75.91 | 47.77 |
| 2018.08 | 205.85 | 212.88 | 212.51 | 171.16 | 117.99 | 74.08 | 46.84 |
| 2018.17 | 206.22 | 213.74 | 212.56 | 169.16 | 115.09 | 72.13 | 46.13 |
| 2018.25 | 206.79 | 214.65 | 212.70 | 167.19 | 112.07 | 70.21 | 45.78 |
| 2018.33 | 207.40 | 215.10 | 212.46 | 165.31 | 109.37 | 68.49 | 45.55 |
| 2018.42 | 207.96 | 214.96 | 211.84 | 163.95 | 107.45 | 66.94 | 44.97 |
| 2018.50 | 208.72 | 214.55 | 211.14 | 163.77 | 107.78 | 67.39 | 45.26 |
| 2018.58 | 209.66 | 214.10 | 210.12 | 163.97 | 109.96 | 70.17 | 47.12 |
| 2018.67 | 210.14 | 213.33 | 208.32 | 163.46 | 112.01 | 73.08 | 49.09 |
| 2018.75 | 210.34 | 212.39 | 206.26 | 162.55 | 113.85 | 76.41 | 51.84 |
| 2018.83 | 210.53 | 211.33 | 204.32 | 161.95 | 116.21 | 80.49 | 55.16 |
| 2018.92 | 210.63 | 210.21 | 202.60 | 161.65 | 118.37 | 83.99 | 58.10 |
| 2019.00 | 210.79 | 209.32 | 201.42 | 161.89 | 120.29 | 86.45 | 60.10 |
| 2019.08 | 210.89 | 208.68 | 200.97 | 162.81 | 122.16 | 88.08 | 61.13 |
| 2019.17 | 210.75 | 208.23 | 201.22 | 164.38 | 124.04 | 89.06 | 61.23 |
| 2019.25 | 210.68 | 207.84 | 201.90 | 166.79 | 126.76 | 90.38 | 61.13 |
| 2019.33 | 210.56 | 207.68 | 202.79 | 169.52 | 129.84 | 91.90 | 61.07 |
| 2019.42 | 210.56 | 207.92 | 203.56 | 171.46 | 132.19 | 93.41 | 61.51 |
| 2019.50 | 210.22 | 208.38 | 204.23 | 172.30 | 132.94 | 93.80 | 61.78 |
| 2019.58 | 209.48 | 208.83 | 205.22 | 173.01 | 132.47 | 92.28 | 60.46 |
| 2019.67 | 208.58 | 209.61 | 207.03 | 174.27 | 132.21 | 90.81 | 58.71 |
| 2019.75 | 207.74 | 210.34 | 209.14 | 176.05 | 132.37 | 89.33 | 56.55 |
| 2019.83 | 207.15 | 210.94 | 211.24 | 178.01 | 132.32 | 87.43 | 54.34 |
| 2019.92 | 206.84 | 211.45 | 213.01 | 179.48 | 132.04 | 85.85 | 52.68 |
| 2020.00 | 206.55 | 211.77 | 214.30 | 180.28 | 131.53 | 84.81 | 51.91 |
| 2020.08 | 206.24 | 211.82 | 214.80 | 180.21 | 130.82 | 84.34 | 51.93 |
| 2020.17 | 205.92 | 211.69 | 214.79 | 179.62 | 130.11 | 84.56 | 52.83 |
| 2020.25 | 205.38 | 211.25 | 214.16 | 178.24 | 128.58 | 84.15 | 53.57 |
| 2020.33 | 204.91 | 210.72 | 213.30 | 176.62 | 126.77 | 83.33 | 53.90 |
| 2020.42 | 204.24 | 210.05 | 212.51 | 175.53 | 125.56 | 82.47 | 53.64 |
| 2020.50 | 203.76 | 209.58 | 212.07 | 174.96 | 124.71 | 81.45 | 52.62 |
| 2020.58 | 203.65 | 209.33 | 212.21 | 175.31 | 124.88 | 81.30 | 51.93 |
| 2020.67 | 203.52 | 208.97 | 212.44 | 175.87 | 125.02 | 80.90 | 51.23 |
| 2020.75 | 203.39 | 208.67 | 212.42 | 176.00 | 124.79 | 80.17 | 50.35 |
| 2020.83 | 202.93 | 208.38 | 212.21 | 175.81 | 124.62 | 79.78 | 49.82 |
| 2020.92 | 202.28 | 208.21 | 212.20 | 175.77 | 124.58 | 79.68 | 49.61 |
| 2021.00 | 201.42 | 207.95 | 212.31 | 175.94 | 124.64 | 79.44 | 49.12 |
| 2021.08 | 200.92 | 208.05 | 212.65 | 176.32 | 124.63 | 78.78 | 48.26 |
| 2021.17 | 200.61 | 208.18 | 212.88 | 176.50 | 124.20 | 77.57 | 47.08 |
| 2021.25 | 200.34 | 208.62 | 213.24 | 176.34 | 123.39 | 76.18 | 45.78 |
| 2021.33 | 200.06 | 209.29 | 213.79 | 176.13 | 122.69 | 75.16 | 44.69 |
| 2021.42 | 200.06 | 210.14 | 214.50 | 176.11 | 122.41 | 74.84 | 44.18 |
| 2021.50 | 200.08 | 210.68 | 214.73 | 175.64 | 122.18 | 75.40 | 45.07 |

**Table S4.**

| year      | f-N <sub>2</sub> O 30N-58N (ppb) |        |        |        |         |         |         |
|-----------|----------------------------------|--------|--------|--------|---------|---------|---------|
| no figure |                                  |        |        |        |         |         |         |
| pressure  | 32 hPa                           | 22 hPa | 15 hPa | 10 hPa | 6.8 hPa | 4.6 hPa | 3.2 hPa |
| 2005.08   | 140.94                           | 131.71 | 112.79 | 76.69  | 48.41   | 31.91   | 21.18   |
| 2005.17   | 139.81                           | 131.22 | 114.28 | 79.30  | 50.45   | 32.92   | 21.61   |
| 2005.25   | 138.73                           | 130.53 | 115.31 | 81.54  | 52.64   | 34.44   | 22.54   |
| 2005.33   | 138.25                           | 130.05 | 115.93 | 83.31  | 54.69   | 35.96   | 23.34   |
| 2005.42   | 137.58                           | 129.74 | 116.79 | 84.94  | 55.74   | 35.96   | 22.92   |
| 2005.50   | 136.92                           | 129.71 | 116.92 | 84.01  | 53.76   | 34.26   | 22.33   |
| 2005.58   | 136.98                           | 129.55 | 115.38 | 81.18  | 51.27   | 33.35   | 22.67   |
| 2005.67   | 138.18                           | 129.58 | 113.49 | 78.25  | 48.99   | 32.61   | 23.06   |
| 2005.75   | 140.82                           | 130.87 | 112.42 | 75.52  | 46.50   | 31.38   | 22.85   |
| 2005.83   | 143.67                           | 132.51 | 111.72 | 73.26  | 44.46   | 30.32   | 22.46   |
| 2005.92   | 146.07                           | 133.86 | 111.04 | 71.13  | 42.51   | 29.33   | 22.16   |
| 2006.00   | 148.42                           | 135.52 | 110.92 | 69.52  | 40.74   | 28.33   | 21.85   |
| 2006.08   | 150.55                           | 137.31 | 111.16 | 68.24  | 39.01   | 27.14   | 21.33   |
| 2006.17   | 152.56                           | 139.31 | 111.85 | 67.42  | 37.46   | 25.78   | 20.51   |
| 2006.25   | 154.56                           | 141.32 | 112.68 | 66.96  | 36.18   | 24.36   | 19.40   |
| 2006.33   | 156.25                           | 143.21 | 113.66 | 66.58  | 34.86   | 22.93   | 18.40   |
| 2006.42   | 158.26                           | 145.21 | 114.42 | 65.96  | 34.01   | 22.69   | 18.55   |
| 2006.50   | 159.62                           | 145.78 | 114.77 | 67.27  | 36.14   | 24.36   | 19.09   |
| 2006.58   | 159.73                           | 145.99 | 116.50 | 70.19  | 38.46   | 24.99   | 18.49   |
| 2006.67   | 158.30                           | 145.87 | 118.56 | 73.13  | 40.57   | 25.60   | 18.11   |
| 2006.75   | 156.11                           | 144.99 | 119.74 | 75.57  | 42.70   | 26.65   | 18.29   |
| 2006.83   | 153.77                           | 143.92 | 120.99 | 78.08  | 44.63   | 27.53   | 18.62   |
| 2006.92   | 151.26                           | 142.62 | 121.91 | 80.32  | 46.51   | 28.39   | 18.86   |
| 2007.00   | 149.05                           | 141.39 | 122.44 | 82.04  | 48.17   | 29.24   | 19.08   |
| 2007.08   | 146.90                           | 139.92 | 122.64 | 83.51  | 49.80   | 30.30   | 19.54   |
| 2007.17   | 144.93                           | 138.25 | 122.27 | 84.38  | 51.17   | 31.48   | 20.27   |
| 2007.25   | 143.04                           | 136.61 | 121.77 | 84.89  | 52.25   | 32.65   | 21.18   |
| 2007.33   | 141.47                           | 135.21 | 121.23 | 85.29  | 53.24   | 33.70   | 22.01   |
| 2007.42   | 139.72                           | 133.93 | 120.85 | 85.66  | 53.75   | 33.85   | 21.89   |
| 2007.50   | 138.91                           | 134.23 | 121.50 | 85.49  | 52.69   | 32.79   | 21.42   |
| 2007.58   | 139.85                           | 135.28 | 120.76 | 83.53  | 51.23   | 32.55   | 21.89   |
| 2007.67   | 141.34                           | 135.21 | 118.46 | 80.82  | 49.70   | 32.44   | 22.56   |
| 2007.75   | 142.50                           | 134.54 | 115.89 | 78.04  | 48.07   | 32.10   | 22.97   |
| 2007.83   | 143.55                           | 134.12 | 113.35 | 75.08  | 46.36   | 31.66   | 22.99   |
| 2007.92   | 145.20                           | 134.39 | 111.31 | 72.32  | 44.62   | 31.15   | 22.97   |
| 2008.00   | 146.57                           | 134.68 | 109.73 | 69.93  | 42.90   | 30.51   | 22.91   |
| 2008.08   | 147.93                           | 135.29 | 108.52 | 67.66  | 41.02   | 29.56   | 22.58   |
| 2008.17   | 149.25                           | 136.12 | 107.82 | 65.80  | 39.15   | 28.33   | 21.93   |
| 2008.25   | 150.50                           | 136.97 | 107.41 | 64.38  | 37.45   | 26.89   | 20.90   |
| 2008.33   | 151.55                           | 137.80 | 107.36 | 63.32  | 35.87   | 25.41   | 19.84   |
| 2008.42   | 152.41                           | 138.28 | 106.98 | 62.30  | 35.04   | 25.19   | 19.98   |
| 2008.50   | 152.44                           | 137.38 | 105.63 | 61.74  | 35.69   | 26.19   | 20.48   |
| 2008.58   | 150.73                           | 135.32 | 105.63 | 63.91  | 38.00   | 27.15   | 20.31   |
| 2008.67   | 147.93                           | 134.17 | 107.78 | 67.50  | 40.50   | 27.67   | 19.55   |
| 2008.75   | 146.18                           | 134.52 | 111.33 | 71.59  | 42.54   | 27.41   | 18.31   |
| 2008.83   | 144.76                           | 135.05 | 114.93 | 75.63  | 44.53   | 27.42   | 17.72   |
| 2008.92   | 143.27                           | 135.01 | 117.83 | 79.36  | 46.65   | 27.81   | 17.52   |
| 2009.00   | 141.82                           | 134.42 | 119.91 | 82.71  | 48.94   | 28.51   | 17.48   |
| 2009.08   | 140.47                           | 133.44 | 121.07 | 85.41  | 51.28   | 29.62   | 17.74   |

|         |        |        |        |       |       |       |       |
|---------|--------|--------|--------|-------|-------|-------|-------|
| 2009.17 | 139.20 | 132.29 | 121.54 | 87.43 | 53.48 | 31.02 | 18.33 |
| 2009.25 | 138.11 | 131.17 | 121.57 | 88.78 | 55.37 | 32.64 | 19.41 |
| 2009.33 | 137.22 | 130.12 | 121.22 | 89.62 | 57.03 | 34.35 | 20.64 |
| 2009.42 | 136.28 | 128.80 | 120.60 | 90.07 | 57.75 | 34.59 | 20.47 |
| 2009.50 | 135.10 | 128.26 | 121.34 | 90.59 | 56.69 | 32.84 | 19.37 |
| 2009.58 | 134.75 | 128.82 | 121.78 | 89.37 | 54.44 | 31.32 | 19.13 |
| 2009.67 | 135.41 | 130.12 | 122.28 | 88.57 | 53.05 | 30.60 | 19.47 |
| 2009.75 | 136.47 | 131.24 | 122.52 | 88.19 | 52.52 | 30.47 | 19.89 |
| 2009.83 | 137.53 | 132.09 | 122.54 | 87.96 | 52.30 | 30.39 | 20.01 |
| 2009.92 | 138.54 | 133.15 | 122.82 | 87.98 | 52.34 | 30.36 | 19.92 |
| 2010.00 | 139.34 | 134.46 | 123.38 | 88.13 | 52.49 | 30.51 | 19.97 |
| 2010.08 | 140.00 | 135.82 | 124.28 | 88.51 | 52.74 | 30.76 | 20.16 |
| 2010.17 | 140.57 | 137.26 | 125.46 | 89.12 | 53.09 | 31.11 | 20.51 |
| 2010.25 | 141.06 | 138.74 | 126.86 | 89.92 | 53.46 | 31.34 | 20.71 |
| 2010.33 | 141.56 | 140.17 | 128.31 | 90.58 | 53.32 | 30.93 | 20.46 |
| 2010.42 | 142.51 | 141.89 | 129.48 | 90.42 | 52.54 | 30.56 | 20.75 |
| 2010.50 | 143.33 | 141.56 | 127.30 | 88.49 | 52.67 | 32.06 | 22.14 |
| 2010.58 | 142.56 | 138.89 | 124.44 | 87.66 | 53.79 | 33.58 | 23.03 |
| 2010.67 | 140.85 | 135.37 | 121.40 | 86.61 | 54.66 | 35.08 | 24.18 |
| 2010.75 | 138.00 | 131.32 | 117.93 | 85.04 | 55.10 | 36.50 | 25.62 |
| 2010.83 | 134.17 | 127.18 | 115.31 | 84.31 | 55.72 | 37.44 | 26.29 |
| 2010.92 | 130.75 | 123.28 | 112.76 | 83.40 | 55.97 | 38.10 | 26.85 |
| 2011.00 | 127.93 | 119.62 | 109.97 | 81.95 | 55.58 | 38.22 | 27.10 |
| 2011.08 | 125.58 | 116.14 | 107.04 | 80.25 | 54.88 | 37.98 | 27.01 |
| 2011.17 | 123.48 | 112.81 | 104.01 | 78.33 | 53.94 | 37.55 | 26.74 |
| 2011.25 | 121.31 | 109.55 | 100.99 | 76.32 | 52.87 | 37.02 | 26.47 |
| 2011.33 | 119.31 | 106.49 | 97.94  | 74.40 | 52.28 | 37.11 | 26.57 |
| 2011.42 | 117.54 | 103.99 | 95.92  | 74.17 | 53.43 | 38.28 | 26.94 |
| 2011.50 | 116.27 | 103.14 | 96.83  | 76.08 | 54.67 | 38.37 | 26.45 |
| 2011.58 | 115.87 | 104.93 | 99.55  | 77.46 | 54.27 | 37.27 | 25.52 |
| 2011.67 | 116.69 | 108.02 | 102.33 | 78.01 | 53.08 | 35.60 | 23.98 |
| 2011.75 | 118.00 | 110.77 | 104.39 | 78.43 | 52.26 | 34.23 | 22.52 |
| 2011.83 | 119.91 | 113.39 | 105.60 | 77.98 | 51.17 | 33.28 | 21.80 |
| 2011.92 | 121.46 | 115.75 | 106.77 | 77.61 | 50.22 | 32.48 | 21.23 |
| 2012.00 | 122.46 | 117.71 | 108.09 | 77.71 | 49.69 | 31.96 | 20.89 |
| 2012.08 | 123.13 | 119.51 | 109.60 | 78.18 | 49.48 | 31.68 | 20.76 |
| 2012.17 | 123.72 | 121.05 | 111.10 | 78.91 | 49.53 | 31.47 | 20.60 |
| 2012.25 | 124.33 | 122.28 | 112.47 | 79.84 | 49.92 | 31.50 | 20.46 |
| 2012.33 | 124.64 | 123.39 | 114.06 | 81.14 | 50.45 | 31.42 | 20.28 |
| 2012.42 | 124.94 | 124.92 | 116.32 | 82.58 | 50.44 | 30.64 | 19.62 |
| 2012.50 | 126.02 | 127.04 | 117.76 | 82.39 | 49.35 | 29.70 | 19.20 |
| 2012.58 | 128.26 | 127.90 | 116.26 | 80.20 | 48.17 | 29.52 | 19.32 |
| 2012.67 | 130.89 | 127.52 | 113.23 | 77.57 | 47.25 | 29.48 | 19.34 |
| 2012.75 | 133.27 | 126.61 | 110.08 | 75.18 | 46.88 | 30.43 | 20.51 |
| 2012.83 | 135.88 | 125.93 | 107.23 | 73.08 | 46.49 | 31.04 | 21.36 |
| 2012.92 | 138.34 | 125.39 | 104.42 | 70.65 | 45.52 | 31.03 | 21.70 |
| 2013.00 | 140.93 | 125.57 | 102.18 | 68.32 | 44.44 | 30.89 | 21.85 |
| 2013.08 | 143.52 | 126.29 | 100.62 | 66.21 | 43.14 | 30.44 | 21.76 |
| 2013.17 | 145.84 | 127.41 | 99.77  | 64.48 | 41.75 | 29.73 | 21.45 |
| 2013.25 | 148.09 | 128.75 | 99.46  | 63.18 | 40.37 | 28.72 | 20.83 |
| 2013.33 | 150.04 | 129.92 | 99.29  | 61.99 | 38.97 | 27.73 | 20.35 |
| 2013.42 | 151.30 | 130.27 | 98.42  | 60.53 | 37.92 | 27.60 | 20.84 |
| 2013.50 | 151.92 | 130.44 | 98.50  | 61.12 | 39.17 | 28.97 | 21.80 |
| 2013.58 | 151.38 | 130.41 | 100.14 | 64.09 | 41.95 | 30.52 | 22.25 |

|         |        |        |        |       |       |       |       |
|---------|--------|--------|--------|-------|-------|-------|-------|
| 2013.67 | 149.48 | 130.51 | 103.26 | 68.06 | 44.58 | 31.61 | 22.57 |
| 2013.75 | 147.38 | 131.42 | 107.06 | 71.50 | 45.83 | 31.28 | 21.83 |
| 2013.83 | 144.96 | 131.88 | 110.03 | 74.05 | 46.80 | 31.37 | 21.68 |
| 2013.92 | 142.37 | 131.97 | 112.71 | 76.75 | 48.17 | 31.77 | 21.71 |
| 2014.00 | 139.87 | 131.66 | 114.93 | 79.35 | 49.63 | 32.17 | 21.68 |
| 2014.08 | 137.38 | 130.94 | 116.52 | 81.69 | 51.25 | 32.80 | 21.80 |
| 2014.17 | 135.06 | 129.92 | 117.45 | 83.54 | 52.77 | 33.60 | 22.13 |
| 2014.25 | 132.90 | 128.87 | 117.91 | 84.73 | 53.92 | 34.45 | 22.70 |
| 2014.33 | 131.15 | 127.98 | 117.97 | 85.45 | 54.94 | 35.36 | 23.26 |
| 2014.42 | 129.67 | 126.94 | 117.64 | 85.98 | 55.78 | 35.61 | 22.79 |
| 2014.50 | 128.10 | 125.69 | 117.17 | 85.67 | 54.69 | 33.98 | 21.56 |
| 2014.58 | 126.95 | 125.78 | 117.71 | 84.84 | 52.65 | 32.45 | 21.39 |
| 2014.67 | 127.29 | 126.88 | 117.72 | 82.94 | 50.37 | 31.56 | 21.97 |
| 2014.75 | 128.14 | 128.13 | 118.07 | 82.12 | 49.27 | 31.07 | 22.18 |
| 2014.83 | 128.37 | 129.03 | 118.96 | 82.44 | 48.78 | 30.26 | 21.67 |
| 2014.92 | 128.78 | 129.93 | 119.84 | 82.94 | 48.68 | 29.82 | 21.32 |
| 2015.00 | 129.25 | 130.88 | 120.70 | 83.42 | 48.74 | 29.68 | 21.21 |
| 2015.08 | 129.71 | 131.64 | 121.31 | 83.79 | 48.86 | 29.62 | 21.09 |
| 2015.17 | 130.10 | 132.19 | 121.68 | 84.03 | 49.03 | 29.61 | 20.95 |
| 2015.25 | 130.49 | 132.84 | 122.14 | 84.42 | 49.35 | 29.71 | 20.86 |
| 2015.33 | 130.90 | 133.59 | 122.88 | 84.97 | 49.55 | 29.59 | 20.65 |
| 2015.42 | 131.59 | 134.66 | 123.80 | 85.13 | 49.23 | 29.61 | 21.19 |
| 2015.50 | 132.11 | 134.96 | 123.38 | 84.75 | 49.99 | 31.24 | 22.64 |
| 2015.58 | 132.18 | 134.12 | 122.38 | 85.27 | 51.85 | 32.76 | 22.89 |
| 2015.67 | 130.74 | 132.11 | 121.82 | 87.05 | 54.34 | 33.96 | 22.44 |
| 2015.75 | 128.13 | 129.38 | 120.64 | 87.70 | 55.80 | 34.87 | 22.31 |
| 2015.83 | 126.52 | 127.97 | 120.08 | 88.24 | 57.07 | 35.91 | 22.55 |
| 2015.92 | 125.21 | 126.79 | 119.67 | 88.67 | 57.96 | 36.60 | 22.73 |
| 2016.00 | 124.03 | 125.45 | 119.07 | 88.88 | 58.61 | 37.20 | 22.99 |
| 2016.08 | 122.92 | 124.18 | 118.49 | 88.95 | 59.04 | 37.71 | 23.37 |
| 2016.17 | 122.05 | 123.18 | 118.08 | 89.06 | 59.48 | 38.32 | 23.94 |
| 2016.25 | 121.27 | 122.25 | 117.60 | 88.93 | 59.62 | 38.72 | 24.49 |
| 2016.33 | 120.58 | 121.46 | 117.15 | 88.75 | 59.64 | 38.97 | 24.83 |
| 2016.42 | 119.87 | 120.24 | 115.96 | 87.90 | 59.29 | 38.94 | 24.75 |
| 2016.50 | 118.71 | 119.22 | 115.62 | 88.10 | 59.60 | 38.92 | 24.37 |
| 2016.58 | 117.63 | 118.53 | 115.44 | 87.96 | 59.38 | 38.79 | 24.45 |
| 2016.67 | 116.86 | 117.89 | 114.98 | 87.71 | 59.22 | 38.67 | 24.50 |
| 2016.75 | 116.67 | 117.50 | 114.40 | 87.32 | 59.02 | 38.56 | 24.57 |
| 2016.83 | 116.42 | 116.76 | 113.38 | 86.39 | 58.54 | 38.52 | 24.80 |
| 2016.92 | 116.02 | 116.01 | 112.48 | 85.66 | 58.22 | 38.58 | 25.01 |
| 2017.00 | 115.46 | 115.33 | 111.61 | 84.88 | 57.80 | 38.48 | 25.05 |
| 2017.08 | 114.80 | 114.66 | 110.86 | 84.20 | 57.34 | 38.32 | 25.07 |
| 2017.17 | 114.10 | 113.99 | 110.21 | 83.61 | 56.85 | 37.99 | 24.91 |
| 2017.25 | 113.19 | 113.16 | 109.56 | 83.17 | 56.50 | 37.71 | 24.73 |
| 2017.33 | 112.00 | 112.13 | 108.76 | 82.74 | 56.48 | 37.94 | 24.97 |
| 2017.42 | 110.91 | 111.49 | 108.74 | 83.56 | 57.72 | 38.79 | 25.16 |
| 2017.50 | 110.29 | 111.35 | 109.40 | 84.56 | 58.22 | 38.64 | 24.79 |
| 2017.58 | 110.28 | 112.76 | 111.50 | 85.76 | 57.91 | 37.78 | 24.35 |
| 2017.67 | 111.16 | 115.07 | 113.60 | 86.06 | 56.83 | 36.90 | 24.37 |
| 2017.75 | 112.85 | 118.72 | 117.11 | 87.49 | 56.35 | 36.01 | 24.01 |
| 2017.83 | 114.57 | 122.04 | 120.30 | 89.05 | 56.15 | 35.13 | 23.34 |
| 2017.92 | 116.33 | 125.26 | 123.16 | 90.43 | 56.13 | 34.57 | 22.90 |
| 2018.00 | 117.88 | 128.20 | 125.97 | 92.04 | 56.48 | 34.30 | 22.61 |
| 2018.08 | 119.16 | 130.90 | 128.66 | 93.75 | 57.13 | 34.28 | 22.43 |

|         |        |        |        |        |       |       |       |
|---------|--------|--------|--------|--------|-------|-------|-------|
| 2018.17 | 120.35 | 133.48 | 131.33 | 95.62  | 58.17 | 34.71 | 22.50 |
| 2018.25 | 121.76 | 135.96 | 133.87 | 97.51  | 59.36 | 35.35 | 22.74 |
| 2018.33 | 123.46 | 138.52 | 136.57 | 99.58  | 60.50 | 35.63 | 22.57 |
| 2018.42 | 125.55 | 141.47 | 139.08 | 100.48 | 59.89 | 34.64 | 22.08 |
| 2018.50 | 127.94 | 143.32 | 138.97 | 98.48  | 57.55 | 33.37 | 21.95 |
| 2018.58 | 129.77 | 141.78 | 134.74 | 94.13  | 55.34 | 33.14 | 22.28 |
| 2018.67 | 130.84 | 138.26 | 129.41 | 91.08  | 55.54 | 34.47 | 23.07 |
| 2018.75 | 130.64 | 133.30 | 123.82 | 88.90  | 56.50 | 36.21 | 24.42 |
| 2018.83 | 129.90 | 127.93 | 118.08 | 86.42  | 57.19 | 38.12 | 26.23 |
| 2018.92 | 128.98 | 122.66 | 112.12 | 83.33  | 57.15 | 39.50 | 27.70 |
| 2019.00 | 128.64 | 118.45 | 106.63 | 79.81  | 56.38 | 40.30 | 28.85 |
| 2019.08 | 128.93 | 115.17 | 101.71 | 76.18  | 55.09 | 40.52 | 29.50 |
| 2019.17 | 129.37 | 112.51 | 97.16  | 72.21  | 53.00 | 39.97 | 29.63 |
| 2019.25 | 129.66 | 110.37 | 93.52  | 68.75  | 50.73 | 38.91 | 29.32 |
| 2019.33 | 129.52 | 108.34 | 90.26  | 65.53  | 48.52 | 37.91 | 29.14 |
| 2019.42 | 128.57 | 106.25 | 87.94  | 64.16  | 48.58 | 38.74 | 29.80 |
| 2019.50 | 126.72 | 104.70 | 87.82  | 65.54  | 50.16 | 39.41 | 29.78 |
| 2019.58 | 125.29 | 105.70 | 90.98  | 69.00  | 51.98 | 39.65 | 29.77 |
| 2019.67 | 124.26 | 108.51 | 95.22  | 71.23  | 51.78 | 38.75 | 29.34 |
| 2019.75 | 123.96 | 111.66 | 98.68  | 72.59  | 51.96 | 38.75 | 29.02 |
| 2019.83 | 123.67 | 114.77 | 102.55 | 75.04  | 53.22 | 39.38 | 28.90 |
| 2019.92 | 123.34 | 117.80 | 106.51 | 77.64  | 54.47 | 39.82 | 28.74 |
| 2020.00 | 122.62 | 120.25 | 110.16 | 80.23  | 55.75 | 40.29 | 28.66 |
| 2020.08 | 121.51 | 122.16 | 113.54 | 82.81  | 57.03 | 40.79 | 28.77 |
| 2020.17 | 120.23 | 123.58 | 116.66 | 85.51  | 58.52 | 41.45 | 29.04 |
| 2020.25 | 119.01 | 124.61 | 119.05 | 87.74  | 60.01 | 42.29 | 29.48 |
| 2020.33 | 118.03 | 125.41 | 120.89 | 89.50  | 61.23 | 43.00 | 29.78 |
| 2020.42 | 117.77 | 126.34 | 122.07 | 89.99  | 60.94 | 42.41 | 29.38 |
| 2020.50 | 118.26 | 127.40 | 122.63 | 89.58  | 60.30 | 42.27 | 29.51 |
| 2020.58 | 117.82 | 126.46 | 121.26 | 88.67  | 60.32 | 42.54 | 29.28 |
| 2020.67 | 117.47 | 126.14 | 121.11 | 88.82  | 60.54 | 42.38 | 28.56 |
| 2020.75 | 117.03 | 126.13 | 121.80 | 89.41  | 60.13 | 41.16 | 27.34 |
| 2020.83 | 117.00 | 126.72 | 122.50 | 89.23  | 58.87 | 39.54 | 26.23 |
| 2020.92 | 116.94 | 127.21 | 123.26 | 89.20  | 57.87 | 38.40 | 25.58 |
| 2021.00 | 116.51 | 127.22 | 123.82 | 89.53  | 57.40 | 37.62 | 25.10 |
| 2021.08 | 116.19 | 127.01 | 124.01 | 89.77  | 57.20 | 37.08 | 24.66 |
| 2021.17 | 116.01 | 126.72 | 123.97 | 90.01  | 57.31 | 36.87 | 24.33 |
| 2021.25 | 115.70 | 126.29 | 123.75 | 90.13  | 57.52 | 36.96 | 24.29 |
| 2021.33 | 115.50 | 125.75 | 123.29 | 90.15  | 57.89 | 37.18 | 24.19 |
| 2021.42 | 114.76 | 124.68 | 123.01 | 90.89  | 58.52 | 37.06 | 23.71 |
| 2021.50 | 114.02 | 124.22 | 123.38 | 91.10  | 57.82 | 36.04 | 23.12 |

**Table S5.**

| year      | f-N2O 30S-58S (ppb) |        |        |        |         |         |         |
|-----------|---------------------|--------|--------|--------|---------|---------|---------|
| no figure |                     |        |        |        |         |         |         |
| pressure  | 32 hPa              | 22 hPa | 15 hPa | 10 hPa | 6.8 hPa | 4.6 hPa | 3.2 hPa |
| 2005.08   | 131.23              | 109.32 | 99.84  | 79.50  | 56.59   | 38.02   | 24.24   |
| 2005.17   | 129.96              | 109.84 | 101.95 | 80.84  | 55.99   | 36.77   | 23.77   |
| 2005.25   | 129.54              | 111.23 | 104.00 | 81.56  | 54.90   | 35.20   | 23.02   |
| 2005.33   | 129.41              | 112.64 | 105.96 | 82.80  | 54.58   | 33.81   | 21.79   |
| 2005.42   | 129.09              | 113.96 | 108.14 | 84.52  | 54.98   | 33.08   | 20.85   |
| 2005.50   | 128.90              | 115.31 | 110.41 | 86.41  | 55.83   | 33.03   | 20.44   |
| 2005.58   | 128.54              | 116.36 | 112.57 | 88.47  | 57.08   | 33.53   | 20.50   |
| 2005.67   | 128.16              | 117.30 | 114.48 | 90.38  | 58.38   | 34.24   | 20.84   |
| 2005.75   | 127.93              | 118.21 | 116.24 | 92.22  | 59.71   | 35.04   | 21.31   |
| 2005.83   | 127.90              | 119.54 | 118.46 | 94.40  | 61.24   | 35.87   | 21.66   |
| 2005.92   | 128.73              | 121.43 | 120.88 | 95.99  | 61.36   | 35.14   | 20.99   |
| 2006.00   | 130.54              | 123.72 | 122.53 | 95.78  | 59.65   | 33.37   | 19.88   |
| 2006.08   | 133.34              | 125.64 | 122.50 | 94.26  | 58.22   | 32.65   | 19.50   |
| 2006.17   | 135.88              | 125.92 | 120.80 | 92.88  | 58.30   | 33.11   | 19.34   |
| 2006.25   | 137.44              | 125.12 | 118.75 | 91.83  | 58.71   | 33.62   | 19.02   |
| 2006.33   | 138.61              | 123.80 | 116.29 | 90.37  | 58.95   | 34.55   | 19.41   |
| 2006.42   | 139.72              | 122.87 | 114.07 | 88.63  | 58.86   | 35.57   | 20.29   |
| 2006.50   | 140.40              | 121.82 | 111.87 | 86.68  | 58.20   | 35.96   | 20.87   |
| 2006.58   | 141.31              | 121.12 | 109.85 | 84.51  | 56.92   | 35.68   | 21.08   |
| 2006.67   | 142.10              | 120.63 | 108.23 | 82.55  | 55.54   | 35.05   | 20.89   |
| 2006.75   | 142.70              | 120.13 | 106.74 | 80.68  | 54.09   | 34.24   | 20.49   |
| 2006.83   | 143.34              | 119.38 | 104.91 | 78.65  | 52.53   | 33.32   | 20.05   |
| 2006.92   | 143.10              | 118.08 | 103.05 | 77.21  | 52.03   | 33.55   | 20.53   |
| 2007.00   | 141.97              | 116.71 | 102.37 | 77.69  | 53.28   | 34.90   | 21.59   |
| 2007.08   | 139.77              | 116.00 | 103.80 | 80.07  | 55.16   | 35.98   | 22.26   |
| 2007.17   | 137.87              | 116.79 | 106.61 | 81.96  | 55.11   | 35.44   | 22.34   |
| 2007.25   | 136.76              | 118.97 | 110.25 | 83.59  | 54.30   | 34.47   | 22.52   |
| 2007.33   | 136.44              | 122.03 | 114.48 | 85.39  | 53.06   | 32.61   | 21.91   |
| 2007.42   | 136.35              | 125.01 | 119.03 | 88.27  | 52.85   | 30.87   | 20.74   |
| 2007.50   | 136.30              | 127.57 | 123.21 | 91.53  | 53.63   | 29.95   | 19.72   |
| 2007.58   | 135.59              | 129.32 | 126.84 | 94.94  | 55.29   | 30.01   | 19.19   |
| 2007.67   | 135.14              | 130.98 | 130.09 | 98.22  | 57.40   | 30.86   | 19.34   |
| 2007.75   | 134.86              | 132.66 | 133.05 | 101.20 | 59.54   | 32.11   | 19.99   |
| 2007.83   | 134.72              | 134.33 | 135.88 | 103.97 | 61.58   | 33.37   | 20.71   |
| 2007.92   | 135.31              | 136.41 | 138.62 | 106.21 | 62.76   | 33.70   | 20.71   |
| 2008.00   | 136.69              | 138.29 | 140.04 | 106.52 | 62.30   | 33.16   | 20.44   |
| 2008.08   | 138.98              | 139.53 | 139.36 | 104.91 | 61.26   | 33.02   | 20.63   |
| 2008.17   | 141.11              | 139.75 | 137.91 | 103.98 | 61.88   | 34.17   | 21.09   |
| 2008.25   | 142.77              | 138.86 | 135.76 | 103.14 | 62.86   | 35.32   | 21.18   |
| 2008.33   | 143.48              | 136.77 | 132.52 | 101.62 | 63.71   | 36.72   | 21.59   |
| 2008.42   | 144.15              | 134.87 | 129.02 | 99.09  | 63.53   | 37.86   | 22.42   |
| 2008.50   | 145.01              | 133.77 | 126.21 | 96.49  | 62.62   | 38.31   | 23.10   |
| 2008.58   | 145.98              | 133.12 | 123.99 | 93.98  | 61.15   | 38.02   | 23.35   |
| 2008.67   | 146.79              | 132.49 | 122.16 | 91.74  | 59.42   | 37.12   | 23.06   |
| 2008.75   | 147.29              | 131.65 | 120.37 | 89.62  | 57.63   | 35.95   | 22.44   |
| 2008.83   | 147.69              | 130.88 | 118.71 | 87.67  | 56.02   | 34.97   | 21.99   |
| 2008.92   | 147.34              | 129.53 | 116.79 | 86.21  | 55.65   | 35.36   | 22.43   |
| 2009.00   | 146.10              | 127.59 | 115.12 | 85.99  | 56.82   | 36.79   | 23.27   |
| 2009.08   | 144.16              | 125.62 | 114.44 | 87.19  | 58.83   | 38.14   | 23.60   |
| 2009.17   | 142.50              | 125.12 | 115.66 | 89.41  | 60.46   | 38.42   | 23.17   |



|         |        |        |        |        |       |       |       |
|---------|--------|--------|--------|--------|-------|-------|-------|
| 2009.25 | 141.09 | 126.24 | 118.88 | 92.37  | 61.49 | 37.93 | 22.57 |
| 2009.33 | 140.23 | 128.41 | 123.03 | 95.79  | 62.56 | 37.33 | 21.81 |
| 2009.42 | 138.97 | 129.96 | 126.83 | 99.56  | 64.55 | 37.51 | 21.28 |
| 2009.50 | 137.34 | 130.12 | 129.11 | 102.56 | 66.74 | 38.38 | 21.25 |
| 2009.58 | 136.19 | 130.25 | 130.77 | 104.92 | 68.69 | 39.42 | 21.55 |
| 2009.67 | 135.23 | 130.45 | 132.02 | 106.74 | 70.33 | 40.46 | 22.03 |
| 2009.75 | 134.72 | 130.85 | 133.17 | 108.25 | 71.70 | 41.43 | 22.61 |
| 2009.83 | 134.16 | 130.94 | 133.77 | 109.32 | 72.99 | 42.50 | 23.24 |
| 2009.92 | 133.97 | 131.21 | 134.55 | 110.56 | 74.04 | 42.90 | 23.18 |
| 2010.00 | 134.18 | 132.28 | 136.44 | 112.27 | 74.61 | 42.50 | 22.66 |
| 2010.08 | 135.17 | 134.71 | 139.01 | 113.01 | 73.39 | 40.93 | 21.87 |
| 2010.17 | 136.68 | 136.86 | 139.48 | 110.54 | 70.02 | 39.06 | 21.72 |
| 2010.25 | 138.64 | 138.15 | 138.14 | 106.98 | 67.00 | 38.13 | 22.15 |
| 2010.33 | 140.91 | 139.18 | 136.18 | 102.84 | 63.56 | 37.00 | 22.62 |
| 2010.42 | 143.55 | 140.89 | 135.26 | 99.40  | 59.82 | 34.99 | 22.37 |
| 2010.50 | 145.58 | 143.11 | 135.97 | 97.81  | 57.10 | 32.93 | 21.62 |
| 2010.58 | 146.80 | 144.74 | 136.88 | 97.21  | 55.51 | 31.39 | 20.74 |
| 2010.67 | 147.96 | 146.23 | 137.87 | 97.17  | 54.78 | 30.57 | 20.15 |
| 2010.75 | 148.83 | 147.66 | 138.98 | 97.42  | 54.46 | 30.12 | 19.78 |
| 2010.83 | 149.93 | 148.99 | 140.27 | 98.16  | 54.56 | 30.03 | 19.82 |
| 2010.92 | 151.09 | 150.50 | 141.46 | 98.25  | 53.96 | 29.67 | 19.95 |
| 2011.00 | 152.44 | 151.70 | 141.63 | 97.49  | 53.31 | 29.78 | 20.55 |
| 2011.08 | 152.95 | 151.45 | 141.08 | 97.67  | 54.50 | 31.34 | 21.84 |
| 2011.17 | 152.60 | 150.47 | 141.09 | 99.50  | 56.91 | 32.93 | 22.42 |
| 2011.25 | 151.78 | 149.30 | 141.19 | 101.49 | 59.22 | 34.05 | 22.40 |
| 2011.33 | 150.73 | 148.26 | 142.00 | 104.66 | 62.77 | 35.93 | 22.59 |
| 2011.42 | 148.87 | 146.18 | 141.59 | 106.72 | 65.95 | 38.19 | 23.31 |
| 2011.50 | 147.94 | 144.59 | 140.56 | 107.32 | 67.80 | 39.98 | 24.21 |
| 2011.58 | 147.38 | 143.46 | 139.73 | 107.45 | 68.82 | 41.21 | 25.06 |
| 2011.67 | 146.59 | 142.23 | 138.89 | 107.25 | 69.15 | 41.78 | 25.58 |
| 2011.75 | 145.96 | 141.13 | 138.10 | 107.04 | 69.36 | 42.13 | 25.94 |
| 2011.83 | 145.28 | 140.30 | 137.28 | 106.39 | 69.05 | 42.01 | 25.81 |
| 2011.92 | 144.57 | 139.47 | 136.68 | 106.33 | 69.27 | 41.97 | 25.40 |
| 2012.00 | 143.95 | 138.94 | 136.75 | 106.93 | 69.61 | 41.55 | 24.51 |
| 2012.08 | 143.67 | 139.25 | 137.17 | 106.56 | 68.31 | 39.95 | 23.21 |
| 2012.17 | 143.76 | 139.71 | 136.91 | 105.02 | 66.34 | 38.62 | 22.75 |
| 2012.25 | 144.18 | 140.42 | 136.80 | 103.35 | 64.26 | 37.58 | 22.81 |
| 2012.33 | 144.55 | 141.42 | 136.78 | 101.27 | 61.52 | 36.06 | 22.62 |
| 2012.42 | 144.73 | 142.74 | 137.29 | 99.67  | 58.83 | 34.12 | 21.99 |
| 2012.50 | 144.44 | 143.93 | 138.31 | 99.03  | 56.94 | 32.42 | 21.21 |
| 2012.58 | 144.82 | 145.11 | 139.55 | 99.44  | 56.19 | 31.25 | 20.40 |
| 2012.67 | 145.25 | 146.04 | 140.42 | 99.88  | 55.88 | 30.53 | 19.80 |
| 2012.75 | 145.70 | 146.72 | 141.12 | 100.43 | 55.93 | 30.18 | 19.33 |
| 2012.83 | 145.93 | 147.21 | 141.93 | 101.29 | 56.30 | 30.01 | 19.01 |
| 2012.92 | 146.30 | 147.69 | 142.54 | 101.65 | 56.06 | 29.50 | 18.73 |
| 2013.00 | 146.81 | 148.04 | 142.36 | 100.63 | 54.58 | 28.37 | 18.24 |
| 2013.08 | 147.17 | 147.20 | 140.12 | 98.06  | 53.12 | 28.14 | 18.40 |
| 2013.17 | 147.04 | 144.82 | 136.48 | 95.92  | 53.43 | 29.45 | 19.21 |
| 2013.25 | 145.95 | 141.07 | 132.45 | 94.77  | 55.04 | 31.56 | 20.40 |
| 2013.33 | 144.73 | 137.10 | 128.52 | 93.69  | 56.48 | 33.60 | 21.77 |
| 2013.42 | 144.19 | 133.32 | 124.26 | 91.94  | 57.21 | 35.08 | 22.82 |
| 2013.50 | 143.83 | 130.05 | 120.07 | 89.70  | 57.35 | 36.12 | 23.60 |
| 2013.58 | 143.83 | 127.71 | 116.20 | 86.64  | 56.35 | 36.46 | 24.17 |
| 2013.67 | 143.73 | 125.67 | 112.97 | 83.83  | 55.02 | 36.29 | 24.36 |

|         |        |        |        |        |       |       |       |
|---------|--------|--------|--------|--------|-------|-------|-------|
| 2013.75 | 143.36 | 123.80 | 110.20 | 81.28  | 53.51 | 35.71 | 24.20 |
| 2013.83 | 142.70 | 122.05 | 107.77 | 78.83  | 51.74 | 34.74 | 23.74 |
| 2013.92 | 141.52 | 120.26 | 105.44 | 76.67  | 50.81 | 35.05 | 24.40 |
| 2014.00 | 140.01 | 118.30 | 103.38 | 75.72  | 51.55 | 36.61 | 25.72 |
| 2014.08 | 138.05 | 116.59 | 103.16 | 77.29  | 53.47 | 37.73 | 26.22 |
| 2014.17 | 136.07 | 116.13 | 105.11 | 79.96  | 54.74 | 37.50 | 25.70 |
| 2014.25 | 134.46 | 116.91 | 107.90 | 82.56  | 55.60 | 36.80 | 24.74 |
| 2014.33 | 132.96 | 117.94 | 110.61 | 85.19  | 56.90 | 36.48 | 23.72 |
| 2014.42 | 131.55 | 118.94 | 113.36 | 88.12  | 58.92 | 37.20 | 23.52 |
| 2014.50 | 130.35 | 119.53 | 115.47 | 90.54  | 60.79 | 38.19 | 23.75 |
| 2014.58 | 128.51 | 119.35 | 116.92 | 92.52  | 62.50 | 39.30 | 24.24 |
| 2014.67 | 126.83 | 119.17 | 118.09 | 94.15  | 63.93 | 40.29 | 24.80 |
| 2014.75 | 125.50 | 119.10 | 119.03 | 95.48  | 65.21 | 41.27 | 25.44 |
| 2014.83 | 124.43 | 119.02 | 119.87 | 96.88  | 66.66 | 42.35 | 26.02 |
| 2014.92 | 123.66 | 119.34 | 121.41 | 98.68  | 67.53 | 42.10 | 25.37 |
| 2015.00 | 123.59 | 120.89 | 123.65 | 99.84  | 67.08 | 40.88 | 24.28 |
| 2015.08 | 125.05 | 123.25 | 125.07 | 99.50  | 66.01 | 40.06 | 23.76 |
| 2015.17 | 127.37 | 125.45 | 125.37 | 98.34  | 65.06 | 39.76 | 23.56 |
| 2015.25 | 130.49 | 127.33 | 124.46 | 96.06  | 63.59 | 39.56 | 23.60 |
| 2015.33 | 133.86 | 128.63 | 122.36 | 92.52  | 61.36 | 39.43 | 24.38 |
| 2015.42 | 137.01 | 130.33 | 120.98 | 89.21  | 58.62 | 38.49 | 24.75 |
| 2015.50 | 139.40 | 132.10 | 120.60 | 86.88  | 56.15 | 37.20 | 24.60 |
| 2015.58 | 141.56 | 133.63 | 120.64 | 85.33  | 54.06 | 35.71 | 23.98 |
| 2015.67 | 143.71 | 135.12 | 120.99 | 84.50  | 52.60 | 34.44 | 23.25 |
| 2015.75 | 145.52 | 136.38 | 121.52 | 84.09  | 51.52 | 33.39 | 22.53 |
| 2015.83 | 147.00 | 137.32 | 121.83 | 83.57  | 50.55 | 32.68 | 22.32 |
| 2015.92 | 148.26 | 137.87 | 121.55 | 83.15  | 50.92 | 33.87 | 23.56 |
| 2016.00 | 149.03 | 137.44 | 120.93 | 83.66  | 52.48 | 35.35 | 24.33 |
| 2016.08 | 148.63 | 136.27 | 120.48 | 84.56  | 53.82 | 36.15 | 24.55 |
| 2016.17 | 147.74 | 135.00 | 119.82 | 84.63  | 54.31 | 36.85 | 25.27 |
| 2016.25 | 146.55 | 133.85 | 119.59 | 84.91  | 54.83 | 37.71 | 26.29 |
| 2016.33 | 145.16 | 132.70 | 119.88 | 85.77  | 55.29 | 37.86 | 26.46 |
| 2016.42 | 143.68 | 131.23 | 119.60 | 86.35  | 55.78 | 37.96 | 26.35 |
| 2016.50 | 143.04 | 129.95 | 119.04 | 86.68  | 56.23 | 38.15 | 26.33 |
| 2016.58 | 142.94 | 129.37 | 118.67 | 86.89  | 56.67 | 38.42 | 26.42 |
| 2016.67 | 142.81 | 128.97 | 118.36 | 86.96  | 56.99 | 38.67 | 26.54 |
| 2016.75 | 142.62 | 128.58 | 117.88 | 86.79  | 57.08 | 38.75 | 26.56 |
| 2016.83 | 142.63 | 128.38 | 117.60 | 86.61  | 56.95 | 38.49 | 26.25 |
| 2016.92 | 142.65 | 127.95 | 117.05 | 85.74  | 55.50 | 36.92 | 25.22 |
| 2017.00 | 142.16 | 127.47 | 116.38 | 84.39  | 53.98 | 36.18 | 25.39 |
| 2017.08 | 141.12 | 126.68 | 115.76 | 83.59  | 53.36 | 36.09 | 25.64 |
| 2017.17 | 139.46 | 125.83 | 116.04 | 84.62  | 54.36 | 36.43 | 25.45 |
| 2017.25 | 137.61 | 125.59 | 117.36 | 86.62  | 55.91 | 36.87 | 25.08 |
| 2017.33 | 135.74 | 125.84 | 119.11 | 88.95  | 58.02 | 37.98 | 25.12 |
| 2017.42 | 134.10 | 125.96 | 120.61 | 90.98  | 59.85 | 39.01 | 25.30 |
| 2017.50 | 132.60 | 126.04 | 121.75 | 92.58  | 61.44 | 40.04 | 25.64 |
| 2017.58 | 130.85 | 125.72 | 122.53 | 93.80  | 62.73 | 41.03 | 26.14 |
| 2017.67 | 129.42 | 125.39 | 123.11 | 94.76  | 63.76 | 41.91 | 26.70 |
| 2017.75 | 128.07 | 124.97 | 123.55 | 95.62  | 64.77 | 42.84 | 27.39 |
| 2017.83 | 126.86 | 124.32 | 123.66 | 96.50  | 66.17 | 44.19 | 28.22 |
| 2017.92 | 125.54 | 123.86 | 124.44 | 98.53  | 68.49 | 45.62 | 28.49 |
| 2018.00 | 124.61 | 123.91 | 126.16 | 101.29 | 70.53 | 46.12 | 28.00 |
| 2018.08 | 124.63 | 125.35 | 128.95 | 103.95 | 71.85 | 46.41 | 27.99 |
| 2018.17 | 125.69 | 128.07 | 131.98 | 104.98 | 70.93 | 45.36 | 27.61 |

|         |        |        |        |        |       |       |       |
|---------|--------|--------|--------|--------|-------|-------|-------|
| 2018.25 | 127.18 | 130.75 | 133.80 | 103.93 | 68.10 | 43.06 | 26.71 |
| 2018.33 | 129.42 | 134.15 | 136.14 | 103.01 | 64.89 | 40.16 | 25.39 |
| 2018.42 | 130.94 | 136.81 | 138.71 | 103.16 | 62.66 | 37.75 | 24.18 |
| 2018.50 | 131.38 | 138.41 | 141.16 | 104.21 | 61.58 | 35.99 | 23.10 |
| 2018.58 | 131.77 | 139.81 | 143.60 | 105.99 | 61.68 | 35.04 | 22.17 |
| 2018.67 | 131.89 | 140.84 | 145.59 | 107.64 | 62.17 | 34.65 | 21.58 |
| 2018.75 | 132.31 | 142.09 | 147.52 | 109.22 | 62.91 | 34.74 | 21.33 |
| 2018.83 | 132.91 | 143.59 | 149.49 | 110.53 | 63.20 | 34.46 | 21.03 |
| 2018.92 | 133.77 | 145.14 | 150.82 | 110.57 | 62.42 | 33.97 | 21.27 |
| 2019.00 | 134.67 | 145.76 | 150.23 | 109.04 | 61.35 | 34.06 | 22.07 |
| 2019.08 | 135.44 | 145.77 | 149.09 | 107.83 | 61.06 | 34.35 | 22.33 |
| 2019.17 | 135.42 | 144.49 | 147.49 | 107.68 | 62.25 | 35.48 | 22.78 |
| 2019.25 | 134.49 | 142.74 | 146.98 | 109.77 | 65.45 | 37.58 | 23.39 |
| 2019.33 | 132.71 | 140.15 | 145.96 | 111.63 | 68.53 | 39.66 | 23.99 |
| 2019.42 | 131.11 | 137.53 | 144.00 | 112.32 | 71.07 | 41.73 | 24.68 |
| 2019.50 | 131.08 | 136.29 | 142.12 | 112.10 | 72.76 | 43.61 | 25.61 |
| 2019.58 | 131.35 | 135.49 | 140.13 | 110.93 | 73.26 | 44.82 | 26.49 |
| 2019.67 | 131.42 | 134.93 | 138.47 | 109.63 | 73.17 | 45.46 | 27.14 |
| 2019.75 | 131.20 | 134.07 | 136.91 | 108.32 | 72.62 | 45.46 | 27.42 |
| 2019.83 | 130.79 | 133.19 | 135.48 | 107.20 | 72.30 | 45.74 | 27.81 |
| 2019.92 | 130.39 | 132.43 | 134.50 | 106.91 | 72.93 | 46.46 | 27.88 |
| 2020.00 | 129.75 | 131.96 | 134.74 | 108.02 | 73.98 | 46.54 | 27.10 |
| 2020.08 | 129.60 | 131.98 | 135.24 | 108.47 | 73.68 | 45.74 | 26.44 |
| 2020.17 | 130.08 | 132.45 | 135.27 | 107.31 | 71.96 | 44.74 | 26.37 |
| 2020.25 | 130.89 | 132.99 | 134.83 | 105.40 | 69.78 | 43.85 | 26.70 |
| 2020.33 | 131.68 | 133.15 | 134.03 | 103.35 | 67.54 | 42.76 | 26.85 |
| 2020.42 | 133.26 | 134.42 | 134.58 | 102.42 | 65.82 | 41.66 | 26.82 |
| 2020.50 | 133.85 | 135.01 | 135.36 | 102.32 | 64.69 | 40.53 | 26.37 |
| 2020.58 | 133.20 | 134.57 | 135.85 | 102.68 | 64.19 | 39.68 | 25.89 |
| 2020.67 | 132.99 | 134.43 | 136.20 | 102.95 | 63.90 | 39.05 | 25.38 |
| 2020.75 | 132.81 | 134.41 | 136.51 | 103.16 | 63.70 | 38.61 | 24.98 |
| 2020.83 | 132.84 | 134.59 | 136.81 | 103.23 | 63.35 | 38.12 | 24.68 |
| 2020.92 | 132.94 | 134.77 | 136.87 | 102.81 | 62.63 | 37.70 | 24.73 |
| 2021.00 | 133.38 | 135.01 | 136.50 | 101.59 | 61.42 | 37.39 | 25.07 |
| 2021.08 | 133.08 | 134.29 | 135.51 | 100.94 | 61.55 | 38.01 | 25.55 |
| 2021.17 | 132.50 | 133.92 | 135.95 | 102.30 | 62.59 | 37.99 | 25.07 |
| 2021.25 | 132.16 | 133.89 | 137.03 | 104.40 | 63.86 | 37.57 | 24.01 |
| 2021.33 | 131.83 | 133.93 | 138.28 | 107.10 | 66.27 | 38.21 | 23.35 |
| 2021.42 | 131.15 | 133.71 | 139.05 | 109.30 | 68.82 | 39.66 | 23.46 |
| 2021.50 | 130.79 | 133.63 | 139.26 | 110.35 | 70.57 | 41.08 | 23.97 |

**Table S6.** Summary of linear trends fitted to time series of f-N<sub>2</sub>O (ppb)

tropics

|         |                   |
|---------|-------------------|
| 32 hPa  | -3.4 ± 0.8 %/dec  |
| 22 hPa  | +0.8 ± 0.8 %/dec  |
| 15 hPa  | +3.7 ± 1.4 %/dec  |
| 10 hPa  | +5.5 ± 2.0 %/dec  |
| 6.8 hPa | +8.6 ± 2.6 %/dec  |
| 4.6 hPa | +12.0 ± 3.8 %/dec |
| 3.2 hPa | +12.6 ± 4.7 %/dec |

NH

|         |                   |
|---------|-------------------|
| 32 hPa  | -14.9 ± 3.0 %/dec |
| 22 hPa  | -7.7 ± 3.2 %/dec  |
| 15 hPa  | +0.6 ± 4.0 %/dec  |
| 10 hPa  | +8.4 ± 4.9 %/dec  |
| 6.8 hPa | +16.1 ± 4.9 %/dec |
| 4.6 hPa | +19.5 ± 4.6 %/dec |
| 3.2 hPa | +18.3 ± 5.0 %/dec |

SH

|         |                   |
|---------|-------------------|
| 32 hPa  | -3.1 ± 2.5 %/dec  |
| 22 hPa  | +4.0 ± 3.4 %/dec  |
| 15 hPa  | +7.9 ± 4.3 %/dec  |
| 10 hPa  | +7.2 ± 4.6 %/dec  |
| 6.8 hPa | +7.2 ± 4.7 %/dec  |
| 4.6 hPa | +11.1 ± 4.7 %/dec |
| 3.2 hPa | +14.5 ± 3.7 %/dec |

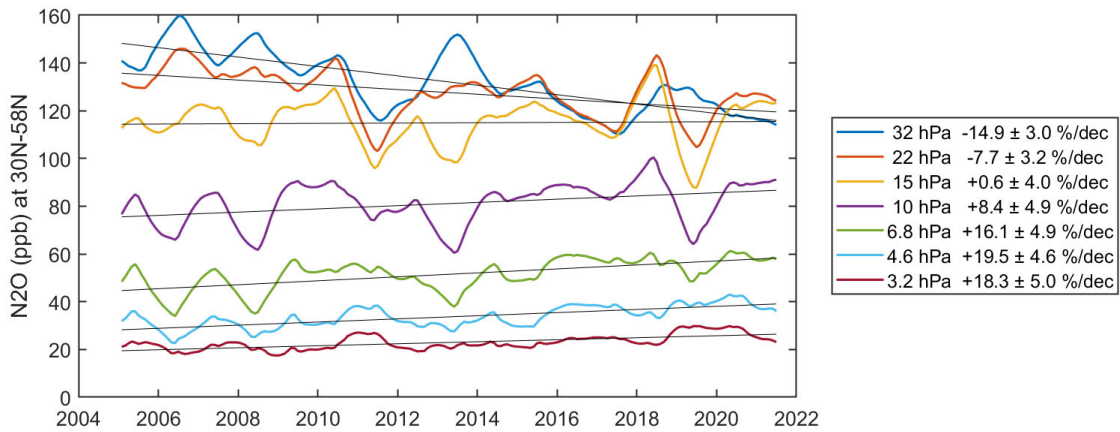

**Figure S1a.** Time series of stratospheric f-N<sub>2</sub>O (ppb) at northern mid-latitudes (30N-58N). See main text Fig. 1

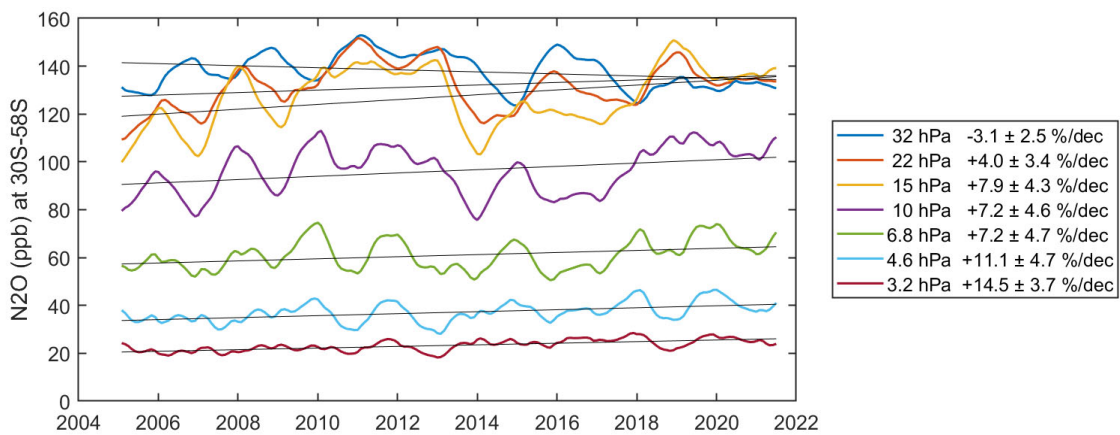

**Figure S1b.** Time series of stratospheric f-N<sub>2</sub>O (ppb) at northern mid-latitudes (30S-58S)
